# Supplementary material for: Clinical manifestations, prevalence, risk factors, outcomes, transmission, diagnosis and treatment of COVID-19 in pregnancy and postpartum: a living systematic review protocol
Source: PubMed Central journal article supplement (PMC7712931; doi:10.1136/bmjopen-2020-041868), 2020-12-02
Supplement: bmjopen-2020-041868.draft_revisions.pdf [file bmjopen-2020-041868.draft_revisions.pdf]

# BMJ Open

BMJ Open is committed to open peer review. As part of this commitment we make the peer review history of every article we publish publicly available.

When an article is published we post the peer reviewers' comments and the authors' responses online. We also post the versions of the paper that were used during peer review. These are the versions that the peer review comments apply to.

The versions of the paper that follow are the versions that were submitted during the peer review process. They are not the versions of record or the final published versions. They should not be cited or distributed as the published version of this manuscript.

BMJ Open is an open access journal and the full, final, typeset and author-corrected version of record of the manuscript is available on our site with no access controls, subscription charges or pay-per-view fees (<http://bmjopen.bmj.com>).

If you have any questions on BMJ Open's open peer review process please email [info.bmjopen@bmj.com](mailto:info.bmjopen@bmj.com)

# BMJ Open

## Clinical manifestations, prevalence, risk factors, outcomes, transmission, diagnosis and treatment of coronavirus disease (COVID-19) in pregnancy and postpartum: A living systematic review protocol

|                               |                                                                                                                                                                                                                                                                                                                                                                                                                                                                                                                                                                                                                                                                                                                                                                                                                                                                                                                                                                                                                                                                                                                                                                                                                                                                                                                                                                                                                                                                                                                                                                                                                                                                                                                                                                                                                                                                                                                                                                                                   |
|-------------------------------|---------------------------------------------------------------------------------------------------------------------------------------------------------------------------------------------------------------------------------------------------------------------------------------------------------------------------------------------------------------------------------------------------------------------------------------------------------------------------------------------------------------------------------------------------------------------------------------------------------------------------------------------------------------------------------------------------------------------------------------------------------------------------------------------------------------------------------------------------------------------------------------------------------------------------------------------------------------------------------------------------------------------------------------------------------------------------------------------------------------------------------------------------------------------------------------------------------------------------------------------------------------------------------------------------------------------------------------------------------------------------------------------------------------------------------------------------------------------------------------------------------------------------------------------------------------------------------------------------------------------------------------------------------------------------------------------------------------------------------------------------------------------------------------------------------------------------------------------------------------------------------------------------------------------------------------------------------------------------------------------------|
| Journal:                      | <i>BMJ Open</i>                                                                                                                                                                                                                                                                                                                                                                                                                                                                                                                                                                                                                                                                                                                                                                                                                                                                                                                                                                                                                                                                                                                                                                                                                                                                                                                                                                                                                                                                                                                                                                                                                                                                                                                                                                                                                                                                                                                                                                                   |
| Manuscript ID                 | bmjopen-2020-041868                                                                                                                                                                                                                                                                                                                                                                                                                                                                                                                                                                                                                                                                                                                                                                                                                                                                                                                                                                                                                                                                                                                                                                                                                                                                                                                                                                                                                                                                                                                                                                                                                                                                                                                                                                                                                                                                                                                                                                               |
| Article Type:                 | Protocol                                                                                                                                                                                                                                                                                                                                                                                                                                                                                                                                                                                                                                                                                                                                                                                                                                                                                                                                                                                                                                                                                                                                                                                                                                                                                                                                                                                                                                                                                                                                                                                                                                                                                                                                                                                                                                                                                                                                                                                          |
| Date Submitted by the Author: | 19-Jun-2020                                                                                                                                                                                                                                                                                                                                                                                                                                                                                                                                                                                                                                                                                                                                                                                                                                                                                                                                                                                                                                                                                                                                                                                                                                                                                                                                                                                                                                                                                                                                                                                                                                                                                                                                                                                                                                                                                                                                                                                       |
| Complete List of Authors:     | <p>Yap, Magnus; University of Birmingham College of Medical and Dental Sciences<br/> Debenham, Luke; University of Birmingham College of Medical and Dental Sciences<br/> Kew, Tania; University of Birmingham College of Medical and Dental Sciences<br/> Chatterjee, Shaunak; University of Birmingham College of Medical and Dental Sciences<br/> Allotey, John; University of Birmingham Institute of Applied Health Research; University of Birmingham, WHO Collaborating Centre for Global Women's Health, Institute of Metabolism and Systems Research<br/> Stallings, Elena; IRYCIS, Clinical Biostatistics Unit; CIBERESP<br/> Coomar, Dyuti; University of Birmingham Institute of Applied Health Research<br/> Lee, Siang; University of Birmingham Institute of Applied Health Research<br/> Qiu, xiu; Guangzhou Women and Children's Medical Center, Division of Birth Cohort Study; Guangzhou Women and Children's Medical Center, Department of Obstetrics and Gynecology<br/> Yuan, Mingyang; Guangzhou Women and Children's Medical Center, Division of Birth Cohort Study<br/> Clavé Llavall, Anna; University of Birmingham College of Medical and Dental Sciences<br/> Dixit, Anushka; University of Birmingham College of Medical and Dental Sciences<br/> Zhou, Dengyi; University of Birmingham College of Medical and Dental Sciences<br/> Balaji, Rishab; University of Birmingham College of Medical and Dental Sciences<br/> van Wely, Madelon; Amsterdam University Medical Centres, Netherlands Satellite of the Cochrane Gynaecology and Fertility Group<br/> Kostova, Elena; Amsterdam University Medical Centres, Netherlands Satellite of the Cochrane Gynaecology and Fertility Group<br/> van Leeuwen, Elisabeth; Amsterdam University Medical Centres, Department of Obstetrics and Gynaecology<br/> Mofenson, Lynne; Elizabeth Glaser Pediatric AIDS Foundation,<br/> Kunst, Heinke; Queen Mary University of London, Department of Respiratory Medicine</p> |

|           |                                                                                                                                                                                                                                                                                                                                                                                                                                                                                                                                                                                                                                                                                                                                                                                                                                                                                                                                                                                                                                                                                                                                                                                                                                                                                                                                                                                                                  |
|-----------|------------------------------------------------------------------------------------------------------------------------------------------------------------------------------------------------------------------------------------------------------------------------------------------------------------------------------------------------------------------------------------------------------------------------------------------------------------------------------------------------------------------------------------------------------------------------------------------------------------------------------------------------------------------------------------------------------------------------------------------------------------------------------------------------------------------------------------------------------------------------------------------------------------------------------------------------------------------------------------------------------------------------------------------------------------------------------------------------------------------------------------------------------------------------------------------------------------------------------------------------------------------------------------------------------------------------------------------------------------------------------------------------------------------|
|           | <p>Khalil, Asma; St George's University of London<br/> Tiberi, Simon; Barts Health NHS Trust, Blizard Institute, Queen Mary University of London, Department of Infection; Barts Health NHS Trust, Department of Infectious Diseases<br/> Thomas, James; University College London Social Science Research Unit<br/> Brizuela, Vanessa; WHO, Department of Reproductive Health and Research<br/> Broutet, Nathalie; WHO, Department of Reproductive Health and Research<br/> Kara, Edna; WHO, Department of Sexual and Reproductive Health and Research<br/> Kim, Caron; WHO, Department of Sexual and Reproductive Health and Research<br/> Thorson, Anna; WHO, Department of Sexual and Reproductive Health and Research<br/> Rayco-Solon, Pura; WHO, The Department of Maternal, Newborn, Child and Adolescent Health<br/> Pardo-Hernandez, Hector; WHO, Cross-cutting Global Initiatives/Nutrition and Food Safety department<br/> Oladapo, Olufemi ; WHO, Department of Sexual and Reproductive Health and Research<br/> Zamora , Javier ; IRYCIS, Clinical Biostatistics Unit; CIBERESP<br/> Bonet, Mercedes; WHO, Department of Sexual and Reproductive Health and Research<br/> Thangaratinam, Shakila; Birmingham Women's and Children's Hospitals NHS Foundation Trust; University of Birmingham, WHO Collaborating Centre for Global Women's Health, Institute of Metabolism and Systems Research</p> |
| Keywords: | Maternal medicine < OBSTETRICS, VIROLOGY, NEONATOLOGY, Protocols & guidelines < HEALTH SERVICES ADMINISTRATION & MANAGEMENT, PERINATOLOGY                                                                                                                                                                                                                                                                                                                                                                                                                                                                                                                                                                                                                                                                                                                                                                                                                                                                                                                                                                                                                                                                                                                                                                                                                                                                        |
|           |                                                                                                                                                                                                                                                                                                                                                                                                                                                                                                                                                                                                                                                                                                                                                                                                                                                                                                                                                                                                                                                                                                                                                                                                                                                                                                                                                                                                                  |

SCHOLARONE™  
Manuscripts

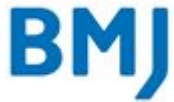

I, the Submitting Author has the right to grant and does grant on behalf of all authors of the Work (as defined in the below author licence), an exclusive licence and/or a non-exclusive licence for contributions from authors who are: i) UK Crown employees; ii) where BMJ has agreed a CC-BY licence shall apply, and/or iii) in accordance with the terms applicable for US Federal Government officers or employees acting as part of their official duties; on a worldwide, perpetual, irrevocable, royalty-free basis to BMJ Publishing Group Ltd ("BMJ") its licensees and where the relevant Journal is co-owned by BMJ to the co-owners of the Journal, to publish the Work in this journal and any other BMJ products and to exploit all rights, as set out in our [licence](#).

The Submitting Author accepts and understands that any supply made under these terms is made by BMJ to the Submitting Author unless you are acting as an employee on behalf of your employer or a postgraduate student of an affiliated institution which is paying any applicable article publishing charge ("APC") for Open Access articles. Where the Submitting Author wishes to make the Work available on an Open Access basis (and intends to pay the relevant APC), the terms of reuse of such Open Access shall be governed by a Creative Commons licence – details of these licences and which [Creative Commons](#) licence will apply to this Work are set out in our licence referred to above.

Other than as permitted in any relevant BMJ Author's Self Archiving Policies, I confirm this Work has not been accepted for publication elsewhere, is not being considered for publication elsewhere and does not duplicate material already published. I confirm all authors consent to publication of this Work and authorise the granting of this licence.

1  
2  
3 **Clinical manifestations, prevalence, risk factors, outcomes, transmission, diagnosis and**  
4 **treatment of coronavirus disease (COVID-19) in pregnancy and postpartum: A living**  
5 **systematic review protocol**  
6  
7  
8

9 Magnus Yap\*,<sup>1</sup> Luke Debenham\*,<sup>1</sup> Tania Kew\*,<sup>1</sup> Shaunak Chatterjee\*,<sup>1</sup> John Allotey,<sup>2,3</sup>  
10 Elena Stallings,<sup>4,5</sup> Dyuti Coomar,<sup>2</sup> Siang Ing Lee,<sup>2</sup> Xiu Qui,<sup>6,7,8</sup> Mingyang Yuan,<sup>2,6</sup> Anna  
11 Clavé Llavall,<sup>1</sup> Anushka Dixit,<sup>1</sup> Dengyi Zhou,<sup>1</sup> Rishab Balaji,<sup>1</sup> Madelon van Wely,<sup>9</sup> Elena  
12 Kostova,<sup>9</sup> Elisabeth van Leeuwen,<sup>10</sup> Lynne Mofenson,<sup>11</sup> Heinke Kunst,<sup>12</sup> Asma Khalil,<sup>13</sup>  
13 Simon Tiberi,<sup>12,14</sup> James Thomas,<sup>15</sup> Vanessa Brizuela,<sup>16</sup> Nathalie Broutet,<sup>16</sup> Edna Kara,<sup>16</sup>  
14 Caron Rahn Kim,<sup>16</sup> Anna Thorson,<sup>16</sup> Paro Rayco-Solon,<sup>16</sup> Hector Pardo-Hernandez,<sup>16</sup>  
15 Olufemi Taiwo Oladapo,<sup>16</sup> Javier Zamora,<sup>4,5,17</sup> Mercedes Bonet,<sup>16</sup> Shakila Thangaratnam<sup>3,18</sup>  
16 for PregCOV-19 Consortium  
17  
18

19  
20  
21 <sup>1</sup>Birmingham Medical School, University of Birmingham, Birmingham, United Kingdom

22 <sup>2</sup>Institute of Applied Health Research, University of Birmingham, Birmingham, United  
23 Kingdom

24 <sup>3</sup>WHO Collaborating Centre for Global Women's Health, Institute of Metabolism and  
25 Systems Research, University of Birmingham, Birmingham, United Kingdom

26 <sup>4</sup>Clinical Biostatistics Unit, Hospital Universitario Ramón y Cajal (IRYCIS), Madrid, Spain

27 <sup>5</sup>CIBER Epidemiology and Public Health (CIBERESP), Madrid, Spain

28 <sup>6</sup>Division of Birth Cohort Study, Guangzhou Women and Children's Medical Center,  
29 Guangzhou Medical University, Guangzhou, China

30 <sup>7</sup>Department of Woman and Child Health Care, Guangzhou Women and Children's Medical  
31 Center, Guangzhou Medical University, Guangzhou, China

32 <sup>8</sup>Department of Obstetrics and Gynecology, Guangzhou Women and Children's Medical  
33 Center, Guangzhou Medical University, Guangzhou, China

34 <sup>9</sup>Netherlands Satellite of the Cochrane Gynaecology and Fertility Group, Amsterdam  
35 University Medical Center, Amsterdam, The Netherlands

36 <sup>10</sup>Department of Obstetrics and Gynaecology, Amsterdam University Medical Center,  
37 Amsterdam, The Netherlands

38 <sup>11</sup>Elizabeth Glaser Pediatric AIDS Foundation, Washington DC, United States

39 <sup>12</sup>Blizard Institute, Queen Mary University of London, London, United Kingdom

40 <sup>13</sup>St George's University London, London, United Kingdom

41 <sup>14</sup>Department of Infectious Diseases, Barts Health NHS Trust, London, United Kingdom

42 <sup>15</sup>UCL Institute of Education, University College London, London, United Kingdom

43 <sup>16</sup>UNDP/UNFPA/UNICEF/WHO/World Bank Special Programme of Research,  
44 Development and Research Training in Human Reproduction (HRP), Department of Sexual  
45 and Reproductive Health and Research, World Health Organization, Avenue Appia 20, 1211,  
46 Geneva, Switzerland

47 <sup>17</sup>Women's Health Research Unit, Queen Mary University of London, London, United  
48 Kingdom

49 <sup>18</sup>Birmingham Women's and Children's NHS Foundation Trust, Birmingham, United  
50 Kingdom  
51  
52

53  
54  
55  
56  
57 \*Joint first authors  
58  
59  
60

1  
2  
3 **Corresponding author:** John Allotey, Institute of Applied Health Research, University of  
4 Birmingham, College of Medical and Dental Sciences, Birmingham, United Kingdom.  
5 Email: [j.allotey.1@bham.ac.uk](mailto:j.allotey.1@bham.ac.uk)  
6  
7

8  
9 Word count: 2765  
10

11 **Keywords:** COVID-19, pregnancy, postpartum, neonate, living systematic review, meta-  
12 analysis, prevalence, risk factors, outcomes, vertical transmission, diagnosis, diagnostic tests,  
13 treatment,  
14  
15  
16  
17  
18  
19  
20  
21  
22  
23  
24  
25  
26  
27  
28  
29  
30  
31  
32  
33  
34  
35  
36  
37  
38  
39  
40  
41  
42  
43  
44  
45  
46  
47  
48  
49  
50  
51  
52  
53  
54  
55  
56  
57  
58  
59  
60

## Abstract

### Introduction

Rapid, robust and continually updated evidence synthesis is required to inform management of COVID-19 (coronavirus disease) in pregnant and postpartum women, and keep pace with the emerging evidence during the pandemic.

### Methods and analysis

We plan to undertake a living systematic review to assess the prevalence, clinical manifestations, risk factors, rates of maternal and perinatal complications, potential for mother-to-child transmission, accuracy of diagnostic tests, and effectiveness of treatment for COVID-19 in pregnant and postpartum women (including after miscarriage or abortion). We will search Medline, Embase, World Health Organization COVID-19 database, preprint servers, the China National Knowledge Infrastructure system and Wanfang databases from inception. We will supplement our search with studies mapped by Cochrane Fertility and Gynaecology group, EPPI-Centre, COVID-19 study repositories, reference lists, and social media blogs. The search will be updated every week and not be restricted by language.

We will include observational cohort (with  $\geq 10$  participants) and randomised studies reporting on prevalence of COVID-19 in pregnant and postpartum women, and the rates of clinical manifestations and outcomes, and risk factors in pregnant and postpartum women alone or in comparison with non-pregnant women with COVID-19 or pregnant women without COVID-19, and studies on tests and treatments for COVID-19. We will additionally include case reports and case series with evidence on mother-to-child transmission of SARS-CoV-2 in utero, intrapartum or postpartum.

1  
2  
3 We will appraise the quality of the included studies using appropriate tools to assess the risk  
4 of bias. At least two independent reviewers will undertake study selection, quality assessment  
5 and data extraction every two weeks. We will synthesise the findings using quantitative  
6 random effects meta-analysis and report odds ratios (OR) or proportions with 95%  
7 confidence intervals and prediction intervals. Case reports and series will be reported as  
8 qualitative narrative synthesis. Heterogeneity will be reported as  $I^2$  and tau-squared statistics.  
9  
10  
11  
12  
13  
14  
15  
16  
17  
18

19 Word count – 300  
20  
21  
22  
23

24 **Ethics and dissemination:** Ethical approval is not required as this is a synthesis of primary  
25 data. Monthly updates of the results will be published on a dedicated website and  
26 disseminated through publications, social media and webinars.  
27  
28  
29  
30  
31  
32

33 Protocol registration number on PROSPERO: CRD42020178076  
34  
35  
36  
37

### 38 **Summary - ‘Strengths and limitations of this study’**

- 39 ● Our living systematic review will be underpinned by a comprehensive literature  
40 search, study quality assessment, and appropriate planned meta-analysis to efficiently  
41 collate the overall findings on COVID-19 in pregnant and postpartum women.  
42
- 43 ● We will continuously update our search, study selection, data extraction, analysis and  
44 reporting of the findings at pre-specified time intervals.  
45
- 46 ● Rapid publication of new studies with new outcomes of interest, screening and testing  
47 strategies and reporting of novel treatments may require changes in the review  
48 protocol, specifically regarding data extraction and search strategies for future  
49 updates.  
50  
51  
52  
53  
54  
55  
56  
57  
58  
59  
60



- 1  
2  
3  
4  
5  
6  
7  
8  
9  
10  
11  
12  
13  
14  
15  
16  
17  
18  
19  
20  
21  
22  
23  
24  
25  
26  
27  
28  
29  
30  
31  
32  
33  
34  
35  
36  
37  
38  
39  
40  
41  
42  
43  
44  
45  
46  
47  
48  
49  
50  
51  
52  
53  
54  
55  
56  
57  
58  
59  
60
- This review may be subject to publication bias, since studies with perceived positive results may be published faster than those with perceived negative results. We will continuously review registries of randomised controlled trials to detect trials that should have reported results but that have not done so and will contact corresponding authors to obtain results.
  - The dynamic nature of the living systematic review requires dedicated team of committed researchers and resources, efficient peer review and support of the journal editors, to ensure that findings are rapidly published in the public domain with provision for continuous updates to inform living guidelines and policies.

## INTRODUCTION

Coronavirus disease (COVID-19) caused by the severe acute respiratory syndrome coronavirus 2 (SARS-CoV-2) was declared a pandemic by the World Health Organization (WHO) on May 11, 2020.<sup>1</sup> In the first three months of the pandemic alone, over 4.5 million individuals have been affected - the infection continues to spread rapidly.<sup>2</sup> Case fatality rates range from 0.4-3.6% depending on the country and detection method.<sup>3,4</sup> In previous serious coronavirus outbreaks caused by SARS and MERS (Middle East Respiratory Syndrome), the rates of intensive care unit admission and mortality were significantly higher in infected pregnant than non-pregnant women, and adverse pregnancy outcomes were common.<sup>5</sup> There are concerns about the potential effects of SARS-CoV-2 infection on mothers and babies, including the risks of transmission to the foetus and neonate.<sup>6</sup> Some countries such as the UK have classed pregnant women as a vulnerable group requiring shielding during the pandemic.<sup>7</sup> Black and ethnic minority individuals are considered to be more likely to be infected and have severe COVID-19 disease than Caucasian individuals.<sup>8-10</sup>

There has been a rapid increase in the numbers of published studies and reports on the prevalence of SARS-CoV-2 infection in pregnancy, risk factors, mother-to-child transmission, effects on pregnant and recently pregnant women, including those who have delivered or had a recent abortion, and their babies.<sup>11</sup> Traditional systematic reviews are not able to keep pace with the rapid pace of publications, and quickly become outdated.<sup>12</sup> Furthermore, numerous systematic reviews, addressing similar questions and including identical numbers of studies that differ very slightly from each other, make it challenging for guideline makers to identify the up to-date evidence.<sup>13,14</sup> Many of these reviews do not follow reporting guidelines and other general principles of conducting robust systematic

1  
2  
3 reviews, often including case series and case control studies in the meta-analysis resulting in  
4  
5 biased estimates.  
6  
7  
8  
9

10 Any recommendation on the care of pregnant women and recently pregnant women with  
11 suspected or confirmed COVID-19, and their babies, should be based on robust evidence.  
12  
13 Clinicians need a single point of reference that comprehensively provides up-to-date evidence  
14 for key questions. In a rapidly changing research and clinical environment, this requires a  
15 clear prospective plan to update the available evidence beyond conventional systematic  
16 reviews and meta-analyses. We propose to undertake a living systematic review to address  
17 the key research questions on SARS-CoV-2 infection in pregnant and postpartum women,  
18 including after childbirth and early pregnancy loss.  
19  
20  
21  
22  
23  
24  
25  
26  
27  
28  
29

### 30 **AIM**

31  
32 Our goal is to provide up to-date evidence on the risks and risk factors for COVID-19 and  
33 associated complications in pregnant and postpartum women and their babies through a  
34 living systematic review and meta-analysis, and to assess the accuracy of diagnostic tests and  
35 effectiveness of treatment in the management of the disease.  
36  
37  
38  
39  
40  
41  
42  
43  
44

### 45 **OBJECTIVES**

46  
47 In pregnant and postpartum women (including after miscarriage or abortion):  
48

- 49 • To determine the prevalence of and risk factors for SARS-CoV-2 infection and severe  
50 COVID-19.  
51
- 52 • To evaluate the accuracy of tests and prediction models for screening, diagnosis and  
53 prediction of COVID-19 and its complications.  
54
- 55 • To assess the effects of interventions for prevention of SARS-CoV-2 infection.  
56  
57  
58  
59  
60

1  
2  
3 In pregnant and postpartum women (including after miscarriage) with suspected or confirmed  
4  
5 COVID-19:  
6  
7

- 8 • To study of rates of clinical symptoms and signs, laboratory and radiological  
9 manifestations of the disease, and compare against non-pregnant women.  
10  
11
- 12 • To assess the rates and risk factors for COVID-related and pregnancy-related  
13 maternal and perinatal outcomes and compare against non-pregnant women with  
14 COVID-19, and pregnant women without the disease respectively.  
15  
16
- 17 • To determine the risks and risk factors for mother-child transmission of SARS-CoV-2  
18 in utero, intra and peripartum, and the prevalence and persistence of the viral particles  
19 or immunological response in breast milk, amniotic fluid, cord blood, placenta,  
20 vaginal fluids and faeces in women and their babies (nasopharyngeal/throat swabs,  
21 blood, saliva, faeces).  
22  
23
- 24 • To assess the effects of interventions to prevent COVID-related complications.  
25  
26
- 27 • To determine if the rates of prevalence, clinical manifestations, outcomes and risk  
28 factors vary by: a) screening and testing strategy for SARS-CoV-2, b) selection of  
29 populations, c) risk status of the included women, timing of exposure (first, second,  
30 third trimester, postpartum), World Bank economic region (low, middle and high  
31 income) and quality of studies (low, high).  
32  
33  
34  
35  
36  
37  
38  
39  
40  
41  
42  
43  
44  
45  
46

## 47 **METHODS**

48  
49 Our systematic review protocol is registered in Prospero (CRD42020178076).<sup>15</sup> We will  
50 regularly repeat the searches, data extraction and analyses as described in Figure 1.  
51  
52  
53  
54  
55  
56  
57  
58  
59  
60

## Literature search

We will carry out a systematic search on the World Health Organisations (WHO) Database of publications on COVID-19, the EPPI-Centre map of the current evidence on COVID-19, Cochrane databases, China National Knowledge Infrastructure (CNKI), Wanfang and preprint databases (ArXiv, BiorXiv, medRxiv, search.bioPreprint), the reference lists of included studies, relevant systematic reviews and guidelines published by national and international professional societies, COVID-19 research websites,<sup>16,17</sup> and follow blogs dedicated to the identification of primary case reports, case series, observational studies or randomised-controlled trials describing women affected by COVID-19 in pregnancy. We will also link with established groups conducting surveillance and research studies in pregnant women with COVID-19 to access their aggregate study data.<sup>18-20</sup> There will be no language restrictions. The search findings will be exported to Covidence (<http://covidence.org/>), an online programme which facilitates study selection and screening, recommended by the Cochrane Collaboration.<sup>21</sup> Our search will be updated weekly. We shall review this frequency every two months.

## Study selection, quality assessment and data extraction

Study selection will be a two-stage process: titles and/or abstracts of studies will be screened first, followed by evaluation of full texts for eligibility by two independent reviewers. Disagreements will be resolved through discussion or by consulting a third reviewer. We will include all cohort studies (with at least 10 participants) and randomised trials reporting on clinical outcomes relating to SARS-CoV-2 infection involving pregnant and postpartum (which includes post-miscarriage/abortion period) women and their babies. We defined cohort studies as those that included women based on exposure, followed-up over specified

1  
2  
3 time and reported outcomes.<sup>22</sup> Case reports and case series will only be included to answer  
4 the research questions relating to mother-to-child transmission.  
5  
6

7 We will look for serological (IgM and IgG) and/or RT-PCR (reverse transcriptase  
8 polymerase chain reaction) confirmation of infection in amniotic fluid, placenta, cord,  
9 newborn and maternal blood, and newborn and maternal respiratory secretions (at birth, 24  
10 and  $\geq 48$  hours after birth) to distinguish between congenital, intrapartum and postpartum  
11 transmission. Women with a respiratory sample (nasal/oropharyngeal swab or  
12 tracheal/bronchoalveolar lavage) positive for SARS-CoV-2 RT-PCR or positive SARS-CoV-  
13 2 serological tests will be considered to have confirmed COVID-19. We will also assess risk  
14 factors such as mode of delivery, rooming-in and breast feeding on mother-to-child  
15 transmission. Women with a clinical diagnosis based on chest computerised tomography  
16 (CT) or radiograph or other features will be considered as suspected COVID-19. Table 1  
17 provides the details of risk factors, maternal, and perinatal outcomes that will be evaluated in  
18 the review.  
19  
20  
21  
22  
23  
24  
25  
26  
27  
28  
29  
30  
31  
32  
33  
34  
35  
36  
37  
38  
39  
40  
41  
42  
43  
44  
45  
46  
47  
48  
49  
50  
51  
52  
53  
54  
55  
56  
57  
58  
59  
60

**Table 1. Study participants, risk factors and outcomes evaluated in the living systematic review on COVID-19 in pregnant and postpartum women**

|                                |                                                                                                                                                                                                                                                                                                                                                                                                                                                                                                                                                                                                                                                                                                                                                                                                                                                                                                                                                                                                                                                                                                                                                                                                                                                                                                                                                                                                                                                                                                                                                                                                                                                                                                                                                                                                                                                                                                                                                                                                                                                                                                                                                                                                                                                                                                                                                                                                                                                                                   |
|--------------------------------|-----------------------------------------------------------------------------------------------------------------------------------------------------------------------------------------------------------------------------------------------------------------------------------------------------------------------------------------------------------------------------------------------------------------------------------------------------------------------------------------------------------------------------------------------------------------------------------------------------------------------------------------------------------------------------------------------------------------------------------------------------------------------------------------------------------------------------------------------------------------------------------------------------------------------------------------------------------------------------------------------------------------------------------------------------------------------------------------------------------------------------------------------------------------------------------------------------------------------------------------------------------------------------------------------------------------------------------------------------------------------------------------------------------------------------------------------------------------------------------------------------------------------------------------------------------------------------------------------------------------------------------------------------------------------------------------------------------------------------------------------------------------------------------------------------------------------------------------------------------------------------------------------------------------------------------------------------------------------------------------------------------------------------------------------------------------------------------------------------------------------------------------------------------------------------------------------------------------------------------------------------------------------------------------------------------------------------------------------------------------------------------------------------------------------------------------------------------------------------------|
| <b>Population</b>              | Pregnant/ postpartum/ postabortal women with suspected of confirmed COVID-19 infection                                                                                                                                                                                                                                                                                                                                                                                                                                                                                                                                                                                                                                                                                                                                                                                                                                                                                                                                                                                                                                                                                                                                                                                                                                                                                                                                                                                                                                                                                                                                                                                                                                                                                                                                                                                                                                                                                                                                                                                                                                                                                                                                                                                                                                                                                                                                                                                            |
| <b>Risk factors</b>            | <p><b>Maternal</b><br/>Age, ethnicity, pre-existing medical conditions (diabetes, chronic hypertension), gestational diabetes, symptoms, hypertensive disorders in pregnancy (pre-eclampsia, pregnancy induced hypertension), BMI (Body Mass Index) <math>\geq 30</math>, multiple pregnancy, in vitro fertilisation, parity, gestational age, mode of delivery, pregnancy status (pregnant or delivered), Reproductive tract infections</p>                                                                                                                                                                                                                                                                                                                                                                                                                                                                                                                                                                                                                                                                                                                                                                                                                                                                                                                                                                                                                                                                                                                                                                                                                                                                                                                                                                                                                                                                                                                                                                                                                                                                                                                                                                                                                                                                                                                                                                                                                                      |
| <b>Clinical manifestations</b> | <p><b>Symptoms and signs</b><br/>Cough, fever, breathlessness, sputum, myalgia, fatigue, diarrhoea, headache, sore throat, chest pain, rigor, ageusia, anosmia, nausea or vomiting, Sequential Organ Failure Assessment (SOFA), Quick SOFA (qSOFA), asymptomatic</p> <p><b>Laboratory</b><br/>White cell count, lymphocyte count, haemoglobin, anaemia, platelet count, albumin, ALT, AST, C-reactive protein, creatinine, lactate dehydrogenase, creatinine kinase, high-sensitivity cardiac troponin, prothrombin time, D-dimer, serum, ferritin, interleukin-6, procalcitonin</p> <p><b>Radiological</b><br/>Consolidation, ground-glass opacity, bilateral pulmonary infiltration, unilateral pulmonary infiltration, abnormal chest X-Ray, abnormal chest CT</p>                                                                                                                                                                                                                                                                                                                                                                                                                                                                                                                                                                                                                                                                                                                                                                                                                                                                                                                                                                                                                                                                                                                                                                                                                                                                                                                                                                                                                                                                                                                                                                                                                                                                                                             |
| <b>Outcomes</b>                | <p><b>Maternal COVID-related outcomes</b><br/>Mortality: all-cause mortality, COVID-specific mortality<br/>Clinical Respiratory Syndrome: pneumonia, respiratory failure, ARDS (Acute Respiratory Distress Syndrome), severe pneumonia; invasive ventilation, non-invasive ventilation, oxygenation; long-term respiratory outcomes<br/>Time from illness onset to outcome (death, recovery)<br/>Hospitalisation: admission to ICU (Intensive Care Unit), admission to hospital, ICU length of stay<br/>Organ Failure: sepsis, septic shock, cardiac failure, coagulopathy, acute cardiac injury, acute kidney injury, acute hepatic failure, cytokine storm syndrome (haemophagocytic lymphohistiocytosis), hypoproteinaemia, acidosis, central nervous system manifestations, secondary infection, duration of viral shedding<br/>Delirium, acute neuropsychiatric emergency, agitation, anxiety, depression, psychosis</p> <p><b>Pregnancy-related outcomes</b><br/>preterm delivery (&lt;37w, spontaneous preterm delivery, induced preterm birth), preterm delivery, preterm-premature rupture of membranes, prelabour rupture of membranes at (or near) term, miscarriage (spontaneous), induced abortion, mode of delivery, induction of labour, chorioamnionitis, wound infection, pregnancy-induced hypertension, gestational diabetes, antepartum haemorrhage, postpartum haemorrhage</p> <p><b>Offspring outcomes</b><br/>Stillbirth, neonatal death (early, late), foetal distress, foetal growth restriction post infection, Apgar score at 1', 5'; cord blood pH, gestational age at delivery, birthweight, LGA (large-for-gestational age), SGA (small-for-gestational age), congenital malformation, HIE (hypoxic ischaemic encephalopathy), neonatal seizures, neonatal infection (other than COVID), neonatal sepsis, neonatal asphyxia, DIC (Disseminated Intravascular Coagulation), NEC (Necrotising Enterocolitis), RDS (Respiratory Distress Syndrome), admission to the neonatal unit, length of stay in neonatal unit</p> <p><b>Mother-to-child transmission outcomes</b><br/>Evidence of virus in amniotic fluid, cord blood, placenta, placental membranes, vaginal fluid, breast milk, neonatal throat swabs, maternal and neonatal faeces and saliva samples; IgM antibodies in cord blood, neonatal blood<br/>Duration of viral shedding after COVID-19 symptoms onset and after clinical resolution of signs/symptoms in mother and in newborn</p> |

1  
2  
3 We will assess the risk of bias for included cohort studies using the Newcastle Ottawa Scale  
4 for comparative cohorts,<sup>23</sup> the Cochrane Risk of Bias 2 (RoB 2) tool for randomised trials,<sup>24</sup>  
5  
6 QUADAS-2 for diagnostic accuracy studies,<sup>25</sup> and the tool outlined by Hoy et al. for  
7  
8 prevalence studies.<sup>26</sup> A pre-piloted form will be used for data extraction of the included  
9  
10 studies. Two reviewers will independently extract data and disagreements will be resolved by  
11  
12 consensus or by consulting a third reviewer. We will assess for duplication of the data by  
13  
14 comparing characteristics of the mother or baby and the settings of the studies. If required,  
15  
16 we will contact the authors of primary studies for clarification about duplicate data. Where  
17  
18 possible, we have planned a semi-automated process to identify duplicates and facilitate rapid  
19  
20 update of search and data extraction.  
21  
22  
23  
24  
25  
26  
27

## 28 **Analysis**

29  
30 We will undertake narrative syntheses and perform aggregate meta-analyses when there are  
31  
32 at least two studies with minimal clinical heterogeneity. Dichotomous outcomes will be  
33  
34 summarised as proportions, odds ratios (OR) and continuous outcomes as standardised mean  
35  
36 differences. We will use random effects model for the analysis when the number of studies  
37  
38 permits to estimate between-study variance. To summarise proportions, we will use Freeman-  
39  
40 Tukey transformation to stabilize variances while dealing with studies with zero events. We  
41  
42 will provide 95% confidence intervals (CI) and predictive intervals (PI) to report on the  
43  
44 precision of estimates and to aid the interpretation of heterogeneity. Heterogeneity will be  
45  
46 reported as  $I^2$  and tau-squared statistics.  
47  
48  
49  
50  
51  
52  
53

54 Pre-planned subgroup analysis will be by a) suspected/probable or confirmed COVID-19, b)  
55  
56 diagnosis in pregnancy or postnatal period, c) trimester of diagnosis (first, second or third), d)  
57  
58 country income-level (high or low- and middle-income country), e) screening strategies  
59  
60



1  
2  
3 (universal, symptom-based or risk-based testing) and f) maternal risk status (low or high). We  
4  
5 will undertake additional sensitivity analysis to explore the effects of different populations  
6  
7 (unselected, selected) and by excluding women with suspected COVID-19, studies with  
8  
9 overlapping samples and studies at high risk of bias. We will use trial sequential analysis to  
10  
11 control for type I and II errors while accounting for updating estimations of between-study  
12  
13 heterogeneity. A priori assumptions on statistical power, minimal clinically relevant effect  
14  
15 and heterogeneity between trials will be used to define maximum sample size to detect such  
16  
17 an effect. Boundaries of statistical significance according to sample size will be defined and  
18  
19 used to determine statistical significance for each systematic review update result.  
20  
21  
22  
23  
24  
25

26 We have established a pool of peer reviewers to rapidly assess the findings. The initial pre-  
27  
28 peer reviewed findings will be published in a dedicated website, followed by the full findings  
29  
30 when peer review is complete. We will simultaneously submit our work for publication in  
31  
32 scientific journals with clear reference to the version of the living systematic review provided  
33  
34 in that submission. Where journals allow, we will update our findings in the journals at set  
35  
36 intervals required by the journal.  
37  
38  
39  
40  
41

### 42 **Patient and public involvement**

43  
44 Katie's Team Patients and Public Involvement group- a dedicated women's research and  
45  
46 health advisory group, were involved in the design of the protocol, and will contribute to the  
47  
48 interpretation and dissemination of the result.  
49  
50  
51

### 52 **DISCUSSION**

53  
54 Our living systematic review will address key research questions relevant to SARS-CoV-2  
55  
56 infection in pregnancy and postpartum period. Our review is based on a prospective protocol  
57  
58  
59  
60

1  
2  
3 with plans to continuously update all review processes from search to publication at specific  
4 time points. The findings of the review will directly inform living guidelines and policies as  
5 new evidence emerge.  
6  
7  
8  
9

10  
11  
12 Our detailed literature search is a major strength of the review. In addition to the WHO  
13 COVID-19 database, our links with Cochrane Fertility and Gynaecology and EPPI Centre  
14 groups, and additional searches for studies mapped by dedicated websites as well as blogs  
15 and social media networks means that the chance of missing relevant studies are small.  
16  
17 Through our networks with key collaborators in the WHO MNCAH (Maternal, neonatal,  
18 child and adolescent health) COVID-19 research group,<sup>27</sup> and relevant working groups, we  
19 will be able to access and include unpublished data. Our collaborative links with researchers  
20 in China provides access to Chinese language databases, so that these studies are not missed.  
21  
22  
23  
24  
25  
26  
27  
28  
29  
30

31  
32  
33 We have developed the protocol to ensure that all stages of the review are robust by adhering  
34 to recommended methods for conduct and reporting of systematic reviews.<sup>28</sup> By restricting  
35 case reports and series to the research question on mother-to-child transmission alone, we  
36 will not only ensure that relevant cases are not missed, but also avoid biased estimates for  
37 other research questions on risk factors and prevalence. Determination of mother-to-child  
38 SARS-CoV-2 transmission is particularly challenging since there is no consensus on what  
39 constitutes intrauterine, intrapartum, and postpartum transmission (including breast-milk  
40 versus horizontal transmission).<sup>6</sup> To maximise data collection addressing this question, we  
41 will include case reports and case series for this part of the review. We will collect data on all  
42 types of samples to enable evaluation of varying definitions of the evidence required for  
43 confirmation of mother-to-child SARS-CoV-2 transmission and timing.  
44  
45  
46  
47  
48  
49  
50  
51  
52  
53  
54  
55  
56  
57  
58  
59  
60

1  
2  
3 Our work is subject to some limitations. Our protocol has been developed based on our  
4 current knowledge of the COVID-19. As the pandemic unfolds, emerging new evidence may  
5 require changes in the protocol. The systematic review will be influenced by the  
6 characteristics of the individual studies, which may comprise heterogeneous populations,  
7 definitions of COVID-19, sampling frames, test strategies for diagnosis, definitions and  
8 reporting of outcomes. We have addressed these challenges by clearly defining the inclusion  
9 criteria, and by exploring heterogeneity through sensitivity and subgroup analyses. The  
10 findings will be reported as 95% CI to communicate the uncertainty around the pooled  
11 estimates and prediction intervals (PI) to anticipate the variability in new study estimates.  
12 Given the urgency of the situation in the pandemic era, many studies are published as  
13 preprints, often followed by a full publication at a later date. The living systematic review  
14 needs to be responsive to any changes in data between the preprint to full publication stage.  
15 Furthermore, there is a risk of duplicate data, as individual studies may report the findings of  
16 the same mother-baby data that have been published elsewhere. We plan to exclude studies  
17 with suspected duplicate data, undertake sensitivity analyses where required, and contact the  
18 authors of the primary studies for clarification. This review may be subject to publication  
19 bias, since studies with perceived positive results may be published faster than those with  
20 perceived negative results. We will continuously review registries of randomised controlled  
21 trials to detect trials that should have reported results but that have not done so and will  
22 contact corresponding authors to obtain results.  
23  
24  
25  
26  
27  
28  
29  
30  
31  
32  
33  
34  
35  
36  
37  
38  
39  
40  
41  
42  
43  
44  
45  
46  
47  
48  
49  
50

51 Many of the automated tools for living systematic review are mainly developed for reviews  
52 on randomised trials (RCT), and not for observational studies.<sup>29</sup> Unlike traditional systematic  
53 reviews, living systematic reviews require substantial investment in time and human  
54 resources, and resources to regularly update the findings. Sustained funding is required to  
55  
56  
57  
58  
59  
60

1  
2  
3 maintain the same level of output over a longer period of time. This is particularly  
4  
5 challenging, as the publication rate of studies on SARS-Cov-2 infection in pregnancy and  
6  
7 postpartum is likely to increase exponentially. To ensure that all relevant studies are  
8  
9 identified in a timely manner, in addition to traditional searches, we will use our  
10  
11 collaborations with other global efforts to map studies on COVID-19 and pregnancy and  
12  
13 postpartum, and automated alerts to identify new evidence when it gets published. Given the  
14  
15 wide scope of this review, numerous reviewers will be involved, requiring clear operating  
16  
17 procedures and pathways in place for workflow, training, monitoring and quality assessment.  
18  
19 The necessity to swiftly publish the collated evidence need to be balanced against publishing  
20  
21 the findings after peer review. To be able to sustain the level of reviewer turn-around every  
22  
23 two weeks will be a challenge.  
24  
25  
26  
27  
28  
29

30  
31 To-date, apart from Cochrane, very few journals provide specific guidelines for publication  
32  
33 of living systematic reviews and its subsequent update.<sup>30</sup> Various models of publication have  
34  
35 been considered.<sup>31</sup> The first model is similar to the Cochrane reviews, where with each new  
36  
37 update (usually done in yearly intervals), there is a new publication with a new version and  
38  
39 DOI in PubMed with linked updates between versions. This model can also take into account  
40  
41 any changes in authors between the versions.<sup>32</sup> However, in the current situation of rapidly  
42  
43 evolving evidence, this is likely to result in numerous publications, even if reported on a  
44  
45 monthly basis. In the second model, the introduction and methods of the main manuscript  
46  
47 does not change, with only changes in the results section, which is written in such a way that  
48  
49 most of the information is provided in Tables and Figures that are revised along with the  
50  
51 abstract. The discussion section of the newer version can incorporate a paragraph on the  
52  
53 implications of new findings. The manuscript will be less resource intensive to prepare in the  
54  
55 second model, but the original version should have been written in a generic manner to  
56  
57  
58  
59  
60

1  
2  
3 accommodate new information emerging in subsequent versions. In another model, the  
4 findings of subsequent updated analyses appear as new appendices, with no changes in the  
5 original abstract or manuscript. While this model requires less efforts from authors, editors  
6 and peer reviewers, it can mistakenly provide inaccurate old evidence if readers only access  
7 the abstract. Furthermore, this model makes it difficult to add or remove authors according to  
8 the changes in their contribution to subsequent versions.  
9  
10  
11  
12  
13  
14  
15  
16  
17  
18

19 In the midst of the current pandemic, much still remains unknown about how SARS-CoV-2  
20 infection affects pregnant and postpartum women and their babies compared to reproductive  
21 aged non-pregnant women. It is essential that clinicians' decisions to manage pregnant and  
22 postpartum women and their babies with COVID-19 are guided by the evidence. Our living  
23 systematic review is well suited to rapidly provide updated findings for translation into  
24 clinical practice. The flexibility of the living systematic review needs to be matched by a  
25 willingness of journal editors and guideline makers to provide a framework that allows rapid  
26 dissemination of the new findings.  
27  
28  
29  
30  
31  
32  
33  
34  
35  
36  
37  
38  
39

#### 40 **Ethics and dissemination**

41  
42 No ethical concerns. The findings will be disseminated through a designated website,  
43 publications, presentations in webinars and social media.  
44  
45  
46  
47

#### 48 **Data statement**

49  
50 Data sharing not applicable as no datasets generated and/or analysed for this study  
51

#### 52 **Author contributions**

53  
54 All authors contributed to the development of the protocol and writing of the manuscript.

55  
56 MY, LD, TK, SC - wrote the first draft of the manuscript and are involved in study selection  
57 and data extraction, and have approved the final version of the manuscript.  
58  
59  
60

1  
2  
3 JA, ES - designed the study, and are involved in data extraction and analysis. They reviewed  
4 the manuscript and have approved the final version of the manuscript.  
5

6  
7 DC, SL - reviewed the manuscript and are involved in quality assessment and data extraction.  
8 They have approved the final version of the manuscript.  
9

10 XQ, MY, MvW, EK, EvL, LM, HK, AK, ST, JT, VB, NB, ED, CRK, AT, OO - reviewed the  
11 manuscript, contributing critical changes, and they have approved the final version of the  
12 manuscript.  
13

14  
15 ACL, AD, DZ, RB - reviewed the manuscript and are involved in study selection, and they  
16 have approved the final version of the manuscript.  
17

18 JZ - reviewed the manuscript and will conduct the statistical analysis. He approved the final  
19 version of the manuscript.  
20

21  
22 MB - designed the study, and reviewed the manuscript, and has approved the final version of  
23 the manuscript.  
24

25 ST - conceived and designed the study, and reviewed the manuscript and approved the final  
26 version of the manuscript. ST is the guarantor.  
27  
28  
29

### 30 **Funding statement**

31  
32 The work is partially funded by the World Health Organization. The authors alone are  
33 responsible for the views expressed in this manuscript and they do not necessarily represent  
34 the decisions, policy or views of the funding bodies. The views of the funding bodies have  
35 not influenced the content of this manuscript.  
36

### 37 **Competing interests**

38  
39 None  
40  
41

### 42 **References**

- 43 1. WHO announces COVID-19 outbreak a pandemic: World Health Organisation [Internet];  
44 2020. [https://www.euro.who.int/en/health-topics/health-emergencies/coronavirus-covid-](https://www.euro.who.int/en/health-topics/health-emergencies/coronavirus-covid-19/news/news/2020/3/who-announces-covid-19-outbreak-a-pandemic)  
45 [19/news/news/2020/3/who-announces-covid-19-outbreak-a-pandemic](https://www.euro.who.int/en/health-topics/health-emergencies/coronavirus-covid-19/news/news/2020/3/who-announces-covid-19-outbreak-a-pandemic) (accessed Jun 11  
46 2020).  
47  
48 2. COVID-19 Dashboard: John Hopkins University [Internet].  
49 <https://coronavirus.jhu.edu/map.html> (accessed Apr 21 2020).  
50  
51 3. Rajgor DD, Lee MH, Archuleta S, et al. The many estimates of the COVID-19 case fatality  
52 rate. *Lancet Infect Dis* 2020 doi: 10.1016/S1473-3099(20)30244-9  
53  
54 4. Mor G, Cardenas I. The immune system in pregnancy: a unique complexity. *Am J Reprod*  
55 *Immunol* 2010;63(6):425-33. doi: 10.1111/j.1600-0897.2010.00836.x  
56  
57 5. Schwartz DA, Graham AL. Potential Maternal and Infant Outcomes from (Wuhan)  
58 Coronavirus 2019-nCoV Infecting Pregnant Women: Lessons from SARS, MERS, and Other  
59 Human Coronavirus Infections. *Viruses* 2020;12(2) doi: 10.3390/v12020194  
60

- 1
- 2
- 3
- 4 6. Blumberg DA, Underwood MA, Hedriana HL, et al. Vertical Transmission of SARS-CoV-2:  
5 What is the Optimal Definition? *Am J Perinatol* 2020 doi: 10.1055/s-0040-1712457
- 6 7. Covid-19 and pregnancy. *BMJ* 2020;369:m1672. doi: 10.1136/bmj.m1672
- 7 8. Kmietowicz Z. Covid-19: Half of pregnant women in UK hospitals are from ethnic  
8 minorities. *BMJ* 2020;369:m2266. doi: 10.1136/bmj.m2266
- 9 9. Millett GA, Jones AT, Benkeser D, et al. Assessing Differential Impacts of COVID-19 on  
10 Black Communities. *Ann Epidemiol* 2020 doi: 10.1016/j.annepidem.2020.05.003
- 11 10. Knight M, Bunch K, Vousden N, et al. Characteristics and outcomes of pregnant women  
12 admitted to hospital with confirmed SARS-CoV-2 infection in UK: national population based  
13 cohort study. *BMJ* 2020;369:m2107. doi: 10.1136/bmj.m2107
- 14 11. Haghani M, Bliemer MCJ, Goerlandt F, et al. The scientific literature on Coronaviruses,  
15 COVID-19 and its associated safety-related research dimensions: A scientometric analysis  
16 and scoping review. *Saf Sci* 2020:104806. doi: 10.1016/j.ssci.2020.104806
- 17 12. Lee AY, Lin MW. Rapid publishing in the era of coronavirus disease 2019 (COVID-19).  
18 *Med J Aust* 2020 doi: 10.5694/mja2.50617
- 19 13. Knottnerus JA, Tugwell P. Methodological challenges in studying the COVID-19 pandemic  
20 crisis. *J Clin Epidemiol* 2020;121:A5-A7. doi: 10.1016/j.jclinepi.2020.04.001
- 21 14. Shokraneh F, Adams CE. Study-based registers of randomized controlled trials: Starting a  
22 systematic review with data extraction or meta-analysis. *Bioimpacts* 2017;7(4):209-17. doi:  
23 10.15171/bi.2017.25
- 24 15. Allotey J, Bonet M, Zamora J, et al. COVID-19 in pregnant women: a Living Systematic  
25 Review on prevalence, presentation, prognosis and treatment. PROSPERO 2020  
26 CRD42020178076. *Prospero [Internet]* 2020
- 27 16. COVID-19, Maternal and Child Health, Nutrition: John Hopkins Center for Humanitarian  
28 health [Internet]. <http://hopkinshumanitarianhealth.org/empower/advocacy/covid-19/covid-19-children-and-nutrition/>  
29 (accessed Jun 9 2020).
- 30 17. COVID-19 Research Community: ResearchGate [Internet].  
31 <https://www.researchgate.net/community/COVID-19> (accessed Jun 9 2020).
- 32 18. COVID-19: a living systematic map of the evidence: Eppi-centre [Internet].  
33 <http://eppi.ioe.ac.uk/cms/Projects/DepartmentofHealthandSocialCare/Publishedreviews/COVID-19Livingssystematicmapoftheevidence/tabid/3765/Default.aspx>  
34 (accessed Jun 11 2020).
- 35 19. NIPH systematic and living map on COVID-19 evidence: Norwegian Institute of Public  
36 Health [Internet]. [https://www.norgesk.no/forskningskart/NIPH\\_mainMap.html](https://www.norgesk.no/forskningskart/NIPH_mainMap.html) (accessed  
37 Jun 11 2020).
- 38 20. Advanced Search: Cochrane Library. <https://www.cochranelibrary.com/advanced-search>  
39 (accessed Jun 11 2020).
- 40 21. Covidence: Cochrane. <https://community.cochrane.org/help/tools-and-software/covidence>  
41 (accessed Jun 14 2020).
- 42 22. Dekkers OM, Egger M, Altman DG, et al. Distinguishing case series from cohort studies.  
43 *Ann Intern Med* 2012;156(1 Pt 1):37-40. doi: 10.7326/0003-4819-156-1-201201030-00006
- 44 23. Wells G, Shea B, O'Connell D, et al. The Newcastle-Ottawa Scale (NOS) for assessing the  
45 quality of nonrandomised studies in meta-analysis: The Ottawa Hospital Research Institute;  
46 2013. [http://www.ohri.ca/programs/clinical\\_epidemiology/oxford.asp](http://www.ohri.ca/programs/clinical_epidemiology/oxford.asp) (accessed Jun 11  
47 2020).
- 48 24. Sterne JAC, Savovic J, Page MJ, et al. RoB 2: a revised tool for assessing risk of bias in  
49 randomised trials. *BMJ* 2019;366:l4898. doi: 10.1136/bmj.l4898
- 50
- 51
- 52
- 53
- 54
- 55
- 56
- 57
- 58
- 59
- 60



- 1  
2  
3  
4  
5  
6  
7  
8  
9  
10  
11  
12  
13  
14  
15  
16  
17  
18  
19  
20  
21  
22  
23  
24  
25  
26  
27  
28  
29  
30  
31  
32  
33  
34  
35  
36
25. Whiting PF, Rutjes AW, Westwood ME, et al. QUADAS-2: a revised tool for the quality assessment of diagnostic accuracy studies. *Ann Intern Med* 2011;155(8):529-36. doi: 10.7326/0003-4819-155-8-201110180-00009
26. Hoy D, Brooks P, Woolf A, et al. Assessing risk of bias in prevalence studies: modification of an existing tool and evidence of interrater agreement. *J Clin Epidemiol* 2012;65(9):934-9. doi: 10.1016/j.jclinepi.2011.11.014
27. Maternal, newborn, child and adolescent health (MNCAH) consolidated data portal: World Health Organisation [Internet]. [https://www.who.int/maternal\\_child\\_adolescent/epidemiology/mncah-data-platform/en/](https://www.who.int/maternal_child_adolescent/epidemiology/mncah-data-platform/en/) (accessed Jun 11 2020).
28. Moher D, Liberati A, Tetzlaff J, et al. Preferred reporting items for systematic reviews and meta-analyses: the PRISMA statement. *BMJ* 2009;339:b2535. doi: 10.1136/bmj.b2535
29. Khamis AM, Kahale LA, Pardo-Hernandez H, et al. Methods of conduct and reporting of living systematic reviews: a protocol for a living methodological survey. *F1000Res* 2019;8:221. doi: 10.12688/f1000research.18005.2
30. Brooker J, Synnot A, Mcdonald S, et al. Guidance for the production and publication of Cochrane living systematic reviews: Cochrane Reviews in living mode. 2019. [https://community.cochrane.org/sites/default/files/uploads/inline-files/Transform/201912\\_LSR\\_Revised\\_Guidance.pdf](https://community.cochrane.org/sites/default/files/uploads/inline-files/Transform/201912_LSR_Revised_Guidance.pdf).
31. Elliott JH, Synnot A, Turner T, et al. Living systematic review: 1. Introduction-the why, what, when, and how. *J Clin Epidemiol* 2017;91:23-30. doi: 10.1016/j.jclinepi.2017.08.010
32. Cumpston M, Chandler J. Updating a review. In: Higgins JPT TJ, Chandler J, Cumpston M, Li T, Page MJ, Welch VA, ed. *Cochrane Handbook for Systematic Reviews of Interventions* version 60 (updated August 2019): Cochrane, 2019.

### 37 **Figure Legend**

38  
39  
40  
41  
42  
43  
44  
45  
46  
47  
48  
49  
50  
51  
52  
53  
54  
55  
56  
57  
58  
59  
60

Figure 1: Steps in the living systematic review (LSR) on COVID-19 in pregnant and postpartum women



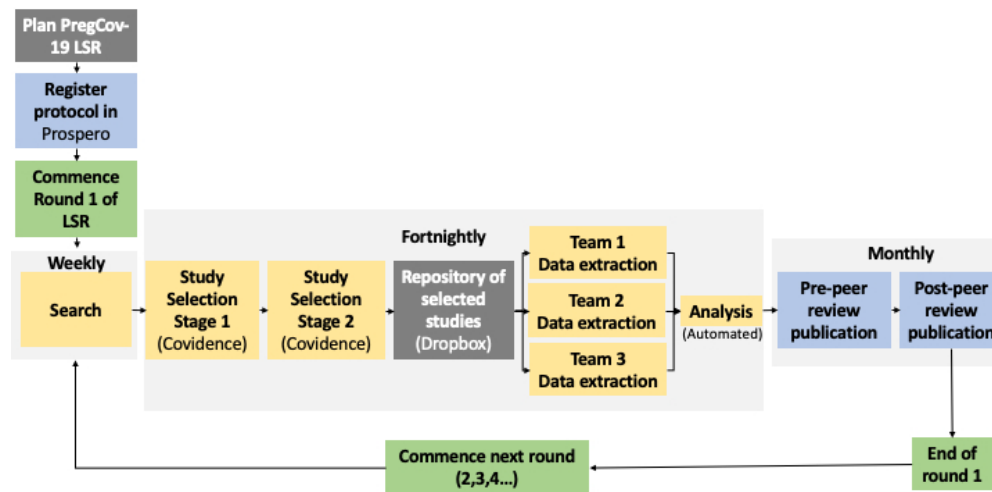

Fig 1. Steps in the living systematic review (LSR) on COVID-19 in pregnant and postpartum women

338x190mm (54 x 54 DPI)

**PRISMA-P (Preferred Reporting Items for Systematic review and Meta-Analysis Protocols) 2015 checklist addressed in the living systematic review protocol on COVID-19 in pregnant and recently pregnant women**

| Section and topic                 | Item No | Checklist item                                                                                                                                                                                                                | Page No.       |
|-----------------------------------|---------|-------------------------------------------------------------------------------------------------------------------------------------------------------------------------------------------------------------------------------|----------------|
| <b>ADMINISTRATIVE INFORMATION</b> |         |                                                                                                                                                                                                                               |                |
| Title:                            |         |                                                                                                                                                                                                                               |                |
| Identification                    | 1a      | Identify the report as a protocol of a systematic review                                                                                                                                                                      | 1              |
| Update                            | 1b      | If the protocol is for an update of a previous systematic review, identify as such                                                                                                                                            | Not applicable |
| Registration                      | 2       | If registered, provide the name of the registry (such as PROSPERO) and registration number                                                                                                                                    | 4              |
| Authors:                          |         |                                                                                                                                                                                                                               |                |
| Contact                           | 3a      | Provide name, institutional affiliation, e-mail address of all protocol authors; provide physical mailing address of corresponding author                                                                                     | 1-2            |
| Contributions                     | 3b      | Describe contributions of protocol authors and identify the guarantor of the review                                                                                                                                           | 16             |
| Amendments                        | 4       | If the protocol represents an amendment of a previously completed or published protocol, identify as such and list changes; otherwise, state plan for documenting important protocol amendments                               | Not applicable |
| Support:                          |         |                                                                                                                                                                                                                               |                |
| Sources                           | 5a      | Indicate sources of financial or other support for the review                                                                                                                                                                 | 16             |
| Sponsor                           | 5b      | Provide name for the review funder and/or sponsor                                                                                                                                                                             | 16             |
| Role of sponsor or funder         | 5c      | Describe roles of funder(s), sponsor(s), and/or institution(s), if any, in developing the protocol                                                                                                                            | 16             |
| <b>INTRODUCTION</b>               |         |                                                                                                                                                                                                                               |                |
| Rationale                         | 6       | Describe the rationale for the review in the context of what is already known                                                                                                                                                 | 6-7            |
| Objectives                        | 7       | Provide an explicit statement of the question(s) the review will address with reference to participants, interventions, comparators, and outcomes (PICO)                                                                      | 7-8            |
| <b>METHODS</b>                    |         |                                                                                                                                                                                                                               |                |
| Eligibility criteria              | 8       | Specify the study characteristics (such as PICO, study design, setting, time frame) and report characteristics (such as years considered, language, publication status) to be used as criteria for eligibility for the review | 9              |

|                                    |     |                                                                                                                                                                                                                                                  |    |
|------------------------------------|-----|--------------------------------------------------------------------------------------------------------------------------------------------------------------------------------------------------------------------------------------------------|----|
| Information sources                | 9   | Describe all intended information sources (such as electronic databases, contact with study authors, trial registers or other grey literature sources) with planned dates of coverage                                                            | 9  |
| Search strategy                    | 10  | Present draft of search strategy to be used for at least one electronic database, including planned limits, such that it could be repeated                                                                                                       | 9  |
| Study records:                     |     |                                                                                                                                                                                                                                                  |    |
| Data management                    | 11a | Describe the mechanism(s) that will be used to manage records and data throughout the review                                                                                                                                                     | 9  |
| Selection process                  | 11b | State the process that will be used for selecting studies (such as two independent reviewers) through each phase of the review (that is, screening, eligibility and inclusion in meta-analysis)                                                  | 9  |
| Data collection process            | 11c | Describe planned method of extracting data from reports (such as piloting forms, done independently, in duplicate), any processes for obtaining and confirming data from investigators                                                           | 9  |
| Data items                         | 12  | List and define all variables for which data will be sought (such as PICO items, funding sources), any pre-planned data assumptions and simplifications                                                                                          | 10 |
| Outcomes and prioritization        | 13  | List and define all outcomes for which data will be sought, including prioritization of main and additional outcomes, with rationale                                                                                                             | 10 |
| Risk of bias in individual studies | 14  | Describe anticipated methods for assessing risk of bias of individual studies, including whether this will be done at the outcome or study level, or both; state how this information will be used in data synthesis                             | 10 |
| Data synthesis                     | 15a | Describe criteria under which study data will be quantitatively synthesised                                                                                                                                                                      | 11 |
|                                    | 15b | If data are appropriate for quantitative synthesis, describe planned summary measures, methods of handling data and methods of combining data from studies, including any planned exploration of consistency (such as $I^2$ , Kendall's $\tau$ ) | 11 |
|                                    | 15c | Describe any proposed additional analyses (such as sensitivity or subgroup analyses, meta-regression)                                                                                                                                            | 11 |
|                                    | 15d | If quantitative synthesis is not appropriate, describe the type of summary planned                                                                                                                                                               | 11 |
| Meta-bias(es)                      | 16  | Specify any planned assessment of meta-bias(es) (such as publication bias across studies, selective reporting within studies)                                                                                                                    | 11 |
| Confidence in cumulative evidence  | 17  | Describe how the strength of the body of evidence will be assessed (such as GRADE)                                                                                                                                                               | 11 |

# BMJ Open

## Clinical manifestations, prevalence, risk factors, outcomes, transmission, diagnosis and treatment of coronavirus disease (COVID-19) in pregnancy and postpartum: A living systematic review protocol

|                               |                                                                                                                                                                                                                                                                                                                                                                                                                                                                                                                                                                                                                                                                                                                                                                                                                                                                                                                                                                                                                                                                                                                                                                                                                                                                                                                                                                                                                                                                                                                                                                                                                                                                                                                                                                                                                                                                                                                                                                                                   |
|-------------------------------|---------------------------------------------------------------------------------------------------------------------------------------------------------------------------------------------------------------------------------------------------------------------------------------------------------------------------------------------------------------------------------------------------------------------------------------------------------------------------------------------------------------------------------------------------------------------------------------------------------------------------------------------------------------------------------------------------------------------------------------------------------------------------------------------------------------------------------------------------------------------------------------------------------------------------------------------------------------------------------------------------------------------------------------------------------------------------------------------------------------------------------------------------------------------------------------------------------------------------------------------------------------------------------------------------------------------------------------------------------------------------------------------------------------------------------------------------------------------------------------------------------------------------------------------------------------------------------------------------------------------------------------------------------------------------------------------------------------------------------------------------------------------------------------------------------------------------------------------------------------------------------------------------------------------------------------------------------------------------------------------------|
| Journal:                      | <i>BMJ Open</i>                                                                                                                                                                                                                                                                                                                                                                                                                                                                                                                                                                                                                                                                                                                                                                                                                                                                                                                                                                                                                                                                                                                                                                                                                                                                                                                                                                                                                                                                                                                                                                                                                                                                                                                                                                                                                                                                                                                                                                                   |
| Manuscript ID                 | bmjopen-2020-041868.R1                                                                                                                                                                                                                                                                                                                                                                                                                                                                                                                                                                                                                                                                                                                                                                                                                                                                                                                                                                                                                                                                                                                                                                                                                                                                                                                                                                                                                                                                                                                                                                                                                                                                                                                                                                                                                                                                                                                                                                            |
| Article Type:                 | Protocol                                                                                                                                                                                                                                                                                                                                                                                                                                                                                                                                                                                                                                                                                                                                                                                                                                                                                                                                                                                                                                                                                                                                                                                                                                                                                                                                                                                                                                                                                                                                                                                                                                                                                                                                                                                                                                                                                                                                                                                          |
| Date Submitted by the Author: | 03-Sep-2020                                                                                                                                                                                                                                                                                                                                                                                                                                                                                                                                                                                                                                                                                                                                                                                                                                                                                                                                                                                                                                                                                                                                                                                                                                                                                                                                                                                                                                                                                                                                                                                                                                                                                                                                                                                                                                                                                                                                                                                       |
| Complete List of Authors:     | <p>Yap, Magnus; University of Birmingham College of Medical and Dental Sciences<br/> Debenham, Luke; University of Birmingham College of Medical and Dental Sciences<br/> Kew, Tania; University of Birmingham College of Medical and Dental Sciences<br/> Chatterjee, Shaunak; University of Birmingham College of Medical and Dental Sciences<br/> Allotey, John; University of Birmingham Institute of Applied Health Research; University of Birmingham, WHO Collaborating Centre for Global Women's Health, Institute of Metabolism and Systems Research<br/> Stallings, Elena; IRYCIS, Clinical Biostatistics Unit; CIBERESP<br/> Coomar, Dyuti; University of Birmingham Institute of Applied Health Research<br/> Lee, Siang; University of Birmingham Institute of Applied Health Research<br/> Qiu, xiu; Guangzhou Women and Children's Medical Center, Division of Birth Cohort Study; Guangzhou Women and Children's Medical Center, Department of Obstetrics and Gynecology<br/> Yuan, Mingyang; Guangzhou Women and Children's Medical Center, Division of Birth Cohort Study<br/> Clavé Llavall, Anna; University of Birmingham College of Medical and Dental Sciences<br/> Dixit, Anushka; University of Birmingham College of Medical and Dental Sciences<br/> Zhou, Dengyi; University of Birmingham College of Medical and Dental Sciences<br/> Balaji, Rishab; University of Birmingham College of Medical and Dental Sciences<br/> van Wely, Madelon; Amsterdam University Medical Centres, Netherlands Satellite of the Cochrane Gynaecology and Fertility Group<br/> Kostova, Elena; Amsterdam University Medical Centres, Netherlands Satellite of the Cochrane Gynaecology and Fertility Group<br/> van Leeuwen, Elisabeth; Amsterdam University Medical Centres, Department of Obstetrics and Gynaecology<br/> Mofenson, Lynne; Elizabeth Glaser Pediatric AIDS Foundation,<br/> Kunst, Heinke; Queen Mary University of London, Department of Respiratory Medicine</p> |

|                                 |                                                                                                                                                                                                                                                                                                                                                                                                                                                                                                                                                                                                                                                                                                                                                                                                                                                                                                                                                                                                                                                                                                                                                                                                                                                                                                                                                                                                                  |
|---------------------------------|------------------------------------------------------------------------------------------------------------------------------------------------------------------------------------------------------------------------------------------------------------------------------------------------------------------------------------------------------------------------------------------------------------------------------------------------------------------------------------------------------------------------------------------------------------------------------------------------------------------------------------------------------------------------------------------------------------------------------------------------------------------------------------------------------------------------------------------------------------------------------------------------------------------------------------------------------------------------------------------------------------------------------------------------------------------------------------------------------------------------------------------------------------------------------------------------------------------------------------------------------------------------------------------------------------------------------------------------------------------------------------------------------------------|
|                                 | <p>Khalil, Asma; St George's University of London<br/> Tiberi, Simon; Barts Health NHS Trust, Blizard Institute, Queen Mary University of London, Department of Infection; Barts Health NHS Trust, Department of Infectious Diseases<br/> Thomas, James; University College London Social Science Research Unit<br/> Brizuela, Vanessa; WHO, Department of Reproductive Health and Research<br/> Broutet, Nathalie; WHO, Department of Reproductive Health and Research<br/> Kara, Edna; WHO, Department of Sexual and Reproductive Health and Research<br/> Kim, Caron; WHO, Department of Sexual and Reproductive Health and Research<br/> Thorson, Anna; WHO, Department of Sexual and Reproductive Health and Research<br/> Rayco-Solon, Pura; WHO, The Department of Maternal, Newborn, Child and Adolescent Health<br/> Pardo-Hernandez, Hector; WHO, Cross-cutting Global Initiatives/Nutrition and Food Safety department<br/> Oladapo, Olufemi ; WHO, Department of Sexual and Reproductive Health and Research<br/> Zamora , Javier ; IRYCIS, Clinical Biostatistics Unit; CIBERESP<br/> Bonet, Mercedes; WHO, Department of Sexual and Reproductive Health and Research<br/> Thangaratinam, Shakila; Birmingham Women's and Children's Hospitals NHS Foundation Trust; University of Birmingham, WHO Collaborating Centre for Global Women's Health, Institute of Metabolism and Systems Research</p> |
| <b>Primary Subject Heading</b>: | Obstetrics and gynaecology                                                                                                                                                                                                                                                                                                                                                                                                                                                                                                                                                                                                                                                                                                                                                                                                                                                                                                                                                                                                                                                                                                                                                                                                                                                                                                                                                                                       |
| Secondary Subject Heading:      | Infectious diseases, Research methods, Epidemiology                                                                                                                                                                                                                                                                                                                                                                                                                                                                                                                                                                                                                                                                                                                                                                                                                                                                                                                                                                                                                                                                                                                                                                                                                                                                                                                                                              |
| Keywords:                       | Maternal medicine < OBSTETRICS, VIROLOGY, NEONATOLOGY, Protocols & guidelines < HEALTH SERVICES ADMINISTRATION & MANAGEMENT, PERINATOLOGY                                                                                                                                                                                                                                                                                                                                                                                                                                                                                                                                                                                                                                                                                                                                                                                                                                                                                                                                                                                                                                                                                                                                                                                                                                                                        |
|                                 |                                                                                                                                                                                                                                                                                                                                                                                                                                                                                                                                                                                                                                                                                                                                                                                                                                                                                                                                                                                                                                                                                                                                                                                                                                                                                                                                                                                                                  |

SCHOLARONE™  
Manuscripts



I, the Submitting Author has the right to grant and does grant on behalf of all authors of the Work (as defined in the below author licence), an exclusive licence and/or a non-exclusive licence for contributions from authors who are: i) UK Crown employees; ii) where BMJ has agreed a CC-BY licence shall apply, and/or iii) in accordance with the terms applicable for US Federal Government officers or employees acting as part of their official duties; on a worldwide, perpetual, irrevocable, royalty-free basis to BMJ Publishing Group Ltd ("BMJ") its licensees and where the relevant Journal is co-owned by BMJ to the co-owners of the Journal, to publish the Work in this journal and any other BMJ products and to exploit all rights, as set out in our [licence](#).

The Submitting Author accepts and understands that any supply made under these terms is made by BMJ to the Submitting Author unless you are acting as an employee on behalf of your employer or a postgraduate student of an affiliated institution which is paying any applicable article publishing charge ("APC") for Open Access articles. Where the Submitting Author wishes to make the Work available on an Open Access basis (and intends to pay the relevant APC), the terms of reuse of such Open Access shall be governed by a Creative Commons licence – details of these licences and which [Creative Commons](#) licence will apply to this Work are set out in our licence referred to above.

Other than as permitted in any relevant BMJ Author's Self Archiving Policies, I confirm this Work has not been accepted for publication elsewhere, is not being considered for publication elsewhere and does not duplicate material already published. I confirm all authors consent to publication of this Work and authorise the granting of this licence.

1  
2  
3 **Clinical manifestations, prevalence, risk factors, outcomes, transmission, diagnosis and**  
4 **treatment of coronavirus disease (COVID-19) in pregnancy and postpartum: A living**  
5 **systematic review protocol**  
6  
7  
8

9 Magnus Yap\*,<sup>1</sup> Luke Debenham\*,<sup>1</sup> Tania Kew\*,<sup>1</sup> Shaunak Chatterjee\*,<sup>1</sup> John Allotey,<sup>2,3</sup>  
10 Elena Stallings,<sup>4,5</sup> Dyuti Coomar,<sup>2</sup> Siang Ing Lee,<sup>2</sup> Xiu Qiu,<sup>6,7,8</sup> Mingyang Yuan,<sup>2,6</sup> Anna  
11 Clavé Llavall,<sup>1</sup> Anushka Dixit,<sup>1</sup> Dengyi Zhou,<sup>1</sup> Rishab Balaji,<sup>1</sup> Madelon van Wely,<sup>9</sup> Elena  
12 Kostova,<sup>9</sup> Elisabeth van Leeuwen,<sup>10</sup> Lynne Mofenson,<sup>11</sup> Heinke Kunst,<sup>12</sup> Asma Khalil,<sup>13</sup>  
13 Simon Tiberi,<sup>12,14</sup> James Thomas,<sup>15</sup> Vanessa Brizuela,<sup>16</sup> Nathalie Broutet,<sup>16</sup> Edna Kara,<sup>16</sup>  
14 Caron Rahn Kim,<sup>16</sup> Anna Thorson,<sup>16</sup> Pura Rayco-Solon,<sup>16</sup> Hector Pardo-Hernandez,<sup>16</sup>  
15 Olufemi Taiwo Oladapo,<sup>16</sup> Javier Zamora,<sup>4,5,17</sup> Mercedes Bonet,<sup>16</sup> Shakila Thangaratnam<sup>3,18</sup>  
16 for PregCOV-19 Consortium  
17  
18  
19

20  
21 <sup>1</sup>Birmingham Medical School, University of Birmingham, Birmingham, United Kingdom

22 <sup>2</sup>Institute of Applied Health Research, University of Birmingham, Birmingham, United  
23 Kingdom

24 <sup>3</sup>WHO Collaborating Centre for Global Women's Health, Institute of Metabolism and  
25 Systems Research, University of Birmingham, Birmingham, United Kingdom

26 <sup>4</sup>Clinical Biostatistics Unit, Hospital Universitario Ramón y Cajal (IRYCIS), Madrid, Spain

27 <sup>5</sup>CIBER Epidemiology and Public Health (CIBERESP), Madrid, Spain

28 <sup>6</sup>Division of Birth Cohort Study, Guangzhou Women and Children's Medical Center,  
29 Guangzhou Medical University, Guangzhou, China

30 <sup>7</sup>Department of Woman and Child Health Care, Guangzhou Women and Children's Medical  
31 Center, Guangzhou Medical University, Guangzhou, China

32 <sup>8</sup>Department of Obstetrics and Gynecology, Guangzhou Women and Children's Medical  
33 Center, Guangzhou Medical University, Guangzhou, China

34 <sup>9</sup>Netherlands Satellite of the Cochrane Gynaecology and Fertility Group, Amsterdam  
35 University Medical Center, Amsterdam, The Netherlands

36 <sup>10</sup>Department of Obstetrics and Gynaecology, Amsterdam University Medical Center,  
37 Amsterdam, The Netherlands

38 <sup>11</sup>Elizabeth Glaser Pediatric AIDS Foundation, Washington DC, United States

39 <sup>12</sup>Blizard Institute, Queen Mary University of London, London, United Kingdom

40 <sup>13</sup>St George's University London, London, United Kingdom

41 <sup>14</sup>Department of Infectious Diseases, Barts Health NHS Trust, London, United Kingdom

42 <sup>15</sup>UCL Institute of Education, University College London, London, United Kingdom

43 <sup>16</sup>UNDP/UNFPA/UNICEF/WHO/World Bank Special Programme of Research,  
44 Development and Research Training in Human Reproduction (HRP), Department of Sexual  
45 and Reproductive Health and Research, World Health Organization, Avenue Appia 20, 1211,  
46 Geneva, Switzerland

47 <sup>17</sup>Women's Health Research Unit, Queen Mary University of London, London, United  
48 Kingdom

49 <sup>18</sup>Birmingham Women's and Children's NHS Foundation Trust, Birmingham, United  
50 Kingdom  
51  
52

53  
54  
55  
56  
57 \*Joint first authors  
58  
59  
60

1  
2  
3 **Corresponding author:** John Allotey, Institute of Applied Health Research, University of  
4 Birmingham, College of Medical and Dental Sciences, Birmingham, United Kingdom.  
5 Email: [j.allotey.1@bham.ac.uk](mailto:j.allotey.1@bham.ac.uk)  
6  
7  
8

9 Word count: 2783  
10

11 **Keywords:** COVID-19, pregnancy, postpartum, neonate, living systematic review, meta-  
12 analysis, prevalence, risk factors, outcomes, vertical transmission, diagnosis, diagnostic tests,  
13 treatment  
14  
15  
16  
17  
18  
19  
20  
21  
22  
23  
24  
25  
26  
27  
28  
29  
30  
31  
32  
33  
34  
35  
36  
37  
38  
39  
40  
41  
42  
43  
44  
45  
46  
47  
48  
49  
50  
51  
52  
53  
54  
55  
56  
57  
58  
59  
60



## Abstract

### Introduction

Rapid, robust and continually updated evidence synthesis is required to inform management of COVID-19 (coronavirus disease) in pregnant and postpartum women, and keep pace with the emerging evidence during the pandemic.

### Methods and analysis

We plan to undertake a living systematic review to assess the prevalence, clinical manifestations, risk factors, rates of maternal and perinatal complications, potential for mother-to-child transmission, accuracy of diagnostic tests, and effectiveness of treatment for COVID-19 in pregnant and postpartum women (including after miscarriage or abortion). We will search Medline, Embase, World Health Organization COVID-19 database, preprint servers, the China National Knowledge Infrastructure system and Wanfang databases from 1 December 2019. We will supplement our search with studies mapped by Cochrane Fertility and Gynaecology group, EPPI-Centre, COVID-19 study repositories, reference lists, and social media blogs. The search will be updated every week and not be restricted by language.

We will include observational cohort ( $\geq 10$  participants) and randomised studies reporting on prevalence of COVID-19 in pregnant and postpartum women, and the rates of clinical manifestations and outcomes, and risk factors in pregnant and postpartum women alone or in comparison with non-pregnant women with COVID-19 or pregnant women without COVID-19, and studies on tests and treatments for COVID-19. We will additionally include case reports and series with evidence on mother-to-child transmission of SARS-CoV-2 in utero, intrapartum or postpartum.

1  
2  
3 We will appraise the quality of the included studies using appropriate tools to assess the risk  
4 of bias. At least two independent reviewers will undertake study selection, quality assessment  
5 and data extraction every two weeks. We will synthesise the findings using quantitative  
6 random effects meta-analysis and report odds ratios (OR) or proportions with 95%  
7 confidence intervals and prediction intervals. Case reports and series will be reported as  
8 qualitative narrative synthesis. Heterogeneity will be reported as  $I^2$  and tau-squared statistics.  
9  
10  
11  
12  
13  
14  
15  
16  
17  
18

19 Word count – 300  
20  
21  
22  
23

24 **Ethics and dissemination:** Ethical approval is not required as this is a synthesis of primary  
25 data. Regular updates of the results will be published on a dedicated website  
26 (<https://www.birmingham.ac.uk/research/who-collaborating-centre/pregcov/index.aspx>) and  
27 disseminated through publications, social media and webinars.  
28  
29  
30  
31  
32  
33  
34

35 Protocol registration number on PROSPERO: CRD42020178076  
36  
37  
38  
39

#### 40 **Summary - ‘Strengths and limitations of this study’**

- 41 ● Our living systematic review will be underpinned by a comprehensive literature  
42 search, study quality assessment, and appropriate planned meta-analysis to efficiently  
43 collate the overall findings on COVID-19 in pregnant and postpartum women.  
44
- 45 ● We will continuously update our search, study selection, data extraction, analysis and  
46 reporting of the findings at pre-specified time intervals.  
47
- 48 ● Rapid publication of new studies with new outcomes of interest, screening and testing  
49 strategies and reporting of novel treatments may require changes in the review  
50  
51  
52  
53  
54  
55  
56  
57  
58  
59  
60

1  
2  
3 protocol, specifically regarding data extraction and search strategies for future  
4  
5 updates.  
6  
7

- 8 ● This review may be subject to publication bias, since studies with perceived positive  
9 results may be published faster than those with perceived negative results thus we will  
10 continuously review registries of randomised controlled trials to detect trials that  
11  
12 should have reported results but that have not done so and will contact corresponding  
13  
14 authors to obtain results.  
15  
16
- 17 ● The dynamic nature of the living systematic review requires dedicated team of  
18  
19 committed researchers and resources, efficient peer review and support of the journal  
20  
21 editors, to ensure that findings are rapidly published in the public domain with  
22  
23 provision for continuous updates to inform living guidelines and policies.  
24  
25  
26  
27  
28  
29  
30  
31  
32  
33  
34  
35  
36  
37  
38  
39  
40  
41  
42  
43  
44  
45  
46  
47  
48  
49  
50  
51  
52  
53  
54  
55  
56  
57  
58  
59  
60

## INTRODUCTION

Coronavirus disease (COVID-19) caused by the severe acute respiratory syndrome coronavirus 2 (SARS-CoV-2) was declared a pandemic by the World Health Organization (WHO) on May 11, 2020.<sup>1</sup> In the first three months of the pandemic alone, over 4.5 million individuals have been affected - the infection continues to spread rapidly.<sup>2</sup> Case fatality rates range from 0.4-3.6% depending on the country and detection method.<sup>3,4</sup> In previous serious coronavirus outbreaks caused by SARS and MERS (Middle East Respiratory Syndrome), the rates of intensive care unit admission and mortality were significantly higher in infected pregnant than non-pregnant women, and adverse pregnancy outcomes were common.<sup>5</sup> There are concerns about the potential effects of SARS-CoV-2 infection on mothers and babies, including the risks of transmission to the foetus and neonate.<sup>6</sup> Some countries such as the UK have classed pregnant women as a vulnerable group requiring shielding during the pandemic.<sup>7</sup> Black and ethnic minority individuals are considered to be more likely to be infected and have severe COVID-19 disease than Caucasian individuals.<sup>8-10</sup>

There has been a rapid increase in the numbers of published studies and reports on the prevalence of SARS-CoV-2 infection in pregnancy, risk factors, mother-to-child transmission, effects on pregnant and recently pregnant women, including those who have delivered or had a recent abortion, and their babies.<sup>11</sup> Traditional systematic reviews are not able to keep pace with the rapid pace of publications, and quickly become outdated.<sup>12</sup> Furthermore, numerous systematic reviews, addressing similar questions and including identical numbers of studies that differ very slightly from each other, make it challenging for guideline makers to identify the up to-date evidence.<sup>13,14</sup> Many of these reviews do not follow reporting guidelines and other general principles of conducting robust systematic

1  
2  
3 reviews, often including case series and case control studies in the meta-analysis resulting in  
4  
5 biased estimates.  
6  
7  
8  
9

10 Any recommendation on the care of pregnant women and recently pregnant women with  
11 suspected or confirmed COVID-19, and their babies, should be based on robust evidence.  
12  
13 Clinicians need a single point of reference that comprehensively provides up-to-date evidence  
14 for key questions. In a rapidly changing research and clinical environment, this requires a  
15 clear prospective plan to update the available evidence beyond conventional systematic  
16 reviews and meta-analyses. We propose to undertake a living systematic review to address  
17 the key research questions on SARS-CoV-2 infection in pregnant and postpartum women,  
18 including after childbirth and early pregnancy loss.  
19  
20  
21  
22  
23  
24  
25  
26  
27  
28  
29

### 30 **AIM**

31  
32 Our goal is to provide up to-date evidence on the risks and risk factors for COVID-19 and  
33 associated complications in pregnant and postpartum women and their babies through a  
34 living systematic review and meta-analysis, and to assess the accuracy of diagnostic tests and  
35 effectiveness of treatment in the management of the disease.  
36  
37  
38  
39  
40  
41  
42  
43  
44

### 45 **OBJECTIVES**

46 In pregnant and postpartum women (including after miscarriage or abortion):

- 47  
48 • To determine the prevalence of and risk factors for SARS-CoV-2 infection and severe  
49 COVID-19.  
50  
51
- 52 • To evaluate the accuracy of tests and prediction models for screening, diagnosis and  
53 prediction of COVID-19 and its complications.  
54  
55
- 56 • To assess the effects of interventions for prevention of SARS-CoV-2 infection.  
57  
58  
59  
60

1  
2  
3 In pregnant and postpartum women (including after miscarriage) with suspected or confirmed  
4  
5 COVID-19:  
6  
7

- 8 • To study the rates of clinical symptoms and signs, laboratory and radiological  
9 manifestations of the disease, and compare against non-pregnant women.  
10  
11
- 12 • To assess the rates and risk factors for COVID-related and pregnancy-related  
13 maternal and perinatal outcomes and compare against non-pregnant women with  
14 COVID-19, and pregnant women without the disease respectively.  
15  
16
- 17 • To determine the risks and risk factors for mother-child transmission of SARS-CoV-2  
18 in utero, intra and peripartum, and the prevalence and persistence of the viral particles  
19 or immunological response in breast milk, amniotic fluid, cord blood, placenta,  
20 vaginal fluids and faeces in women and their babies (nasopharyngeal/throat swabs,  
21 blood, saliva, faeces).  
22  
23
- 24 • To assess the effects of interventions to prevent COVID-related complications.  
25  
26
- 27 • To determine if the rates of prevalence, clinical manifestations, outcomes and risk  
28 factors vary by: a) screening and testing strategy for SARS-CoV-2, b) selection of  
29 populations, c) risk status of the included women, timing of exposure (first, second,  
30 third trimester, postpartum), World Bank economic region (low, middle and high  
31 income) and quality of studies (low, high).  
32  
33  
34  
35  
36  
37  
38  
39  
40  
41  
42  
43  
44  
45  
46

## 47 **METHODS**

48  
49 Our systematic review protocol is registered in Prospero (CRD42020178076).<sup>15</sup> We will  
50 regularly repeat the searches, data extraction and analyses as described in Figure 1.  
51  
52  
53  
54  
55  
56  
57  
58  
59  
60

## Literature search

We will carry out a systematic search on the World Health Organisations (WHO) Database of publications on COVID-19, the EPPI-Centre map of the current evidence on COVID-19, Cochrane databases, China National Knowledge Infrastructure (CNKI), Wanfang and preprint databases (ArXiv, BiorXiv, medRxiv, search.bioPreprint), the reference lists of included studies, relevant systematic reviews and guidelines published by national and international professional societies, COVID-19 research websites,<sup>16,17</sup> and follow blogs dedicated to the identification of primary case reports, case series, observational studies or randomised-controlled trials describing women affected by COVID-19 in pregnancy. We will also link with established groups conducting surveillance and research studies in pregnant women with COVID-19 to access their aggregate study data.<sup>18-20</sup> There will be no language restrictions. The search findings will be exported to Covidence (<http://covidence.org/>), an online programme which facilitates study selection and screening, recommended by the Cochrane Collaboration.<sup>21</sup> Our search will be updated weekly, and we shall review this frequency every two months. The search syntax for the Pubmed database is provided in Appendix 1

## Study selection, quality assessment and data extraction

Study selection will be a two-stage process: titles and/or abstracts of studies will be screened first, followed by evaluation of full texts for eligibility by two independent reviewers.

Disagreements will be resolved through discussion or by consulting a third reviewer. We will include all cohort studies (with at least 10 participants) and randomised trials reporting on clinical outcomes relating to SARS-CoV-2 infection involving pregnant and postpartum (which includes post-miscarriage/abortion period) women and their babies. We defined cohort studies as those that included women based on exposure, followed-up over specified

1  
2  
3 time and reported outcomes.<sup>22</sup> Case reports and case series will only be included to answer  
4 the research questions relating to mother-to-child transmission.  
5  
6  
7  
8  
9

10 We will look for serological (IgM) and/or RT-PCR (reverse transcriptase polymerase chain  
11 reaction) confirmation of infection in amniotic fluid, placenta, cord, newborn and maternal  
12 blood, and newborn and maternal respiratory secretions (at birth, 24 and  $\geq$ 48 hours after  
13 birth) to distinguish between congenital, intrapartum and postpartum transmission. Women  
14 with a respiratory sample (naso/oropharyngeal swab or tracheal/bronchoalveolar lavage)  
15 positive for SARS-CoV-2 RT-PCR or positive SARS-CoV-2 serological tests will be  
16 considered to have confirmed COVID-19. We will also assess risk factors such as mode of  
17 delivery, maternal disease severity, gestational age of maternal infection, preterm delivery,  
18 rooming-in and breast feeding on mother-to-child transmission. Women with a clinical  
19 diagnosis based on chest computerised tomography (CT) or radiograph or other features will  
20 be considered as suspected COVID-19. Table 1 provides the details of risk factors, maternal,  
21 and perinatal outcomes that will be evaluated in the review.  
22  
23  
24  
25  
26  
27  
28  
29  
30  
31  
32  
33  
34  
35  
36  
37  
38  
39  
40  
41  
42  
43  
44  
45  
46  
47  
48  
49  
50  
51  
52  
53  
54  
55  
56  
57  
58  
59  
60



**Table 1. Study participants, risk factors and outcomes evaluated in the living systematic review on COVID-19 in pregnant and postpartum women**

|                                |                                                                                                                                                                                                                                                                                                                                                                                                                                                                                                                                                                                                                                                                                                                                                                                                                                                                                                                                                                                                                                                                                                                                                                                                                                                                                                                                                                                                                                                                                                                                                                                                                                                                                                                                                                                                                                                                                                                                                                                                                                                                                                                                                                                                                                                                                                                                                                                                                                                                                                                |
|--------------------------------|----------------------------------------------------------------------------------------------------------------------------------------------------------------------------------------------------------------------------------------------------------------------------------------------------------------------------------------------------------------------------------------------------------------------------------------------------------------------------------------------------------------------------------------------------------------------------------------------------------------------------------------------------------------------------------------------------------------------------------------------------------------------------------------------------------------------------------------------------------------------------------------------------------------------------------------------------------------------------------------------------------------------------------------------------------------------------------------------------------------------------------------------------------------------------------------------------------------------------------------------------------------------------------------------------------------------------------------------------------------------------------------------------------------------------------------------------------------------------------------------------------------------------------------------------------------------------------------------------------------------------------------------------------------------------------------------------------------------------------------------------------------------------------------------------------------------------------------------------------------------------------------------------------------------------------------------------------------------------------------------------------------------------------------------------------------------------------------------------------------------------------------------------------------------------------------------------------------------------------------------------------------------------------------------------------------------------------------------------------------------------------------------------------------------------------------------------------------------------------------------------------------|
| <b>Population</b>              | Pregnant/ postpartum/ postabortal women with suspected or confirmed COVID-19 infection                                                                                                                                                                                                                                                                                                                                                                                                                                                                                                                                                                                                                                                                                                                                                                                                                                                                                                                                                                                                                                                                                                                                                                                                                                                                                                                                                                                                                                                                                                                                                                                                                                                                                                                                                                                                                                                                                                                                                                                                                                                                                                                                                                                                                                                                                                                                                                                                                         |
| <b>Risk factors</b>            | <p><b>Maternal</b></p> <p>Age, ethnicity, pre-existing medical conditions (including diabetes, chronic hypertension, asthma and COPD), smoking, immunosuppression, gestational diabetes, symptoms, hypertensive disorders in pregnancy (pre-eclampsia, pregnancy induced hypertension), BMI (Body Mass Index) <math>\geq 30</math>, multiple pregnancy, in vitro fertilisation, parity, gestational age, mode of delivery, pregnancy status (pregnant or delivered), Reproductive tract infections, symptoms and abnormal lab results.</p>                                                                                                                                                                                                                                                                                                                                                                                                                                                                                                                                                                                                                                                                                                                                                                                                                                                                                                                                                                                                                                                                                                                                                                                                                                                                                                                                                                                                                                                                                                                                                                                                                                                                                                                                                                                                                                                                                                                                                                     |
| <b>Clinical manifestations</b> | <p><b>Symptoms and signs</b></p> <p>Cough, fever, breathlessness, sputum, myalgia, fatigue, diarrhoea, headache, sore throat, chest pain, rigor, ageusia, anosmia, nausea or vomiting, Sequential Organ Failure Assessment (SOFA), Quick SOFA (qSOFA), asymptomatic presentation</p> <p><b>Laboratory</b></p> <p>White cell count, lymphocyte count, haemoglobin, anaemia, platelet count, albumin, ALT, AST, C-reactive protein, creatinine, lactate dehydrogenase, creatinine kinase, high-sensitivity cardiac troponin, prothrombin time, D-dimer, serum, ferritin, interleukin-6, procalcitonin</p> <p><b>Radiological</b></p> <p>Consolidation, ground-glass opacity, bilateral pulmonary infiltration, unilateral pulmonary infiltration, abnormal chest X-Ray, abnormal chest CT</p>                                                                                                                                                                                                                                                                                                                                                                                                                                                                                                                                                                                                                                                                                                                                                                                                                                                                                                                                                                                                                                                                                                                                                                                                                                                                                                                                                                                                                                                                                                                                                                                                                                                                                                                    |
| <b>Outcomes</b>                | <p><b>Maternal COVID-related outcomes</b></p> <p>Mortality: all-cause mortality, COVID-specific mortality</p> <p>Clinical Respiratory Syndrome: pneumonia, respiratory failure, ARDS (Acute Respiratory Distress Syndrome), severe pneumonia; invasive ventilation, non-invasive ventilation, oxygenation; long-term respiratory outcomes</p> <p>Time from illness onset to outcome (death, recovery)</p> <p>Hospitalisation: admission to ICU (Intensive Care Unit), admission to hospital, ICU length of stay</p> <p>Organ Failure: sepsis, septic shock, cardiac failure, coagulopathy, thromboembolism, acute cardiac injury, acute kidney injury, acute hepatic failure, cytokine storm syndrome (haemophagocytic lymphohistiocytosis), hypoproteinaemia, acidosis, central nervous system manifestations, secondary infection, duration of viral shedding</p> <p>Delirium, acute neuropsychiatric emergency, agitation, anxiety, depression, psychosis</p> <p><b>Pregnancy-related outcomes</b></p> <p>Preterm delivery (&lt;37w, spontaneous preterm delivery, induced preterm birth), preterm-premature rupture of membranes, prelabour rupture of membranes at (or near) term, miscarriage (spontaneous), induced abortion, mode of delivery, induction of labour, chorioamnionitis, wound infection, pregnancy-induced hypertension, gestational diabetes, antepartum haemorrhage, postpartum haemorrhage</p> <p><b>Offspring outcomes</b></p> <p>Stillbirth, neonatal death (early, late), foetal distress, foetal growth restriction post infection, Apgar score at 1', 5'; cord blood pH, gestational age at delivery, birthweight, LGA (large-for-gestational age), SGA (small-for-gestational age), congenital malformation, HIE (hypoxic ischaemic encephalopathy), neonatal seizures, neonatal infection (other than COVID), neonatal sepsis, neonatal asphyxia, DIC (Disseminated Intravascular Coagulation), NEC (Necrotising Enterocolitis), RDS (Respiratory Distress Syndrome), admission to the neonatal unit, length of stay in neonatal unit</p> <p><b>Mother-to-child transmission outcomes</b></p> <p>Evidence of virus in amniotic fluid, cord blood, placenta, placental membranes, vaginal fluid, breast milk, neonatal throat swabs, maternal and neonatal faeces and saliva samples; IgM antibodies in cord blood, neonatal blood</p> <p>Duration of viral shedding after COVID-19 symptoms onset and after clinical resolution of signs/symptoms in mother and in newborn</p> |

1  
2  
3  
4  
5  
6 We will assess the risk of bias for included cohort studies using the Newcastle Ottawa Scale  
7  
8 for comparative cohorts,<sup>23</sup> the Cochrane Risk of Bias 2 (RoB 2) tool for randomised trials,<sup>24</sup>  
9  
10 QUADAS-2 for diagnostic accuracy studies,<sup>25</sup> and the tool outlined by Hoy et al. for  
11  
12 prevalence studies.<sup>26</sup> A pre-piloted form will be used for data extraction of the included  
13  
14 studies. Two reviewers will independently extract data and disagreements will be resolved by  
15  
16 consensus or by consulting a third reviewer. We will assess for duplication of the data by  
17  
18 comparing characteristics of the mother or baby and the settings of the studies. If required,  
19  
20 we will contact the authors of primary studies for clarification about duplicate data. Where  
21  
22 possible, we have planned a semi-automated process to identify duplicates and facilitate rapid  
23  
24 update of search and data extraction.  
25  
26  
27  
28  
29

### 30 31 **Analysis**

32  
33 We will undertake narrative syntheses and perform aggregate meta-analyses when there are  
34  
35 at least two studies with minimal clinical heterogeneity. Dichotomous outcomes will be  
36  
37 summarised as proportions, odds ratios (OR) and continuous outcomes as standardised mean  
38  
39 differences. We will use random effects model for the analysis when the number of studies  
40  
41 permits to estimate between-study variance. To summarise proportions, we will use Freeman-  
42  
43 Tukey transformation to stabilize variances while dealing with studies with zero events. We  
44  
45 will provide 95% confidence intervals (CI) and predictive intervals (PI) to report on the  
46  
47 precision of estimates and to aid the interpretation of heterogeneity. Heterogeneity will be  
48  
49 reported as  $I^2$  and tau-squared statistics.  
50  
51  
52  
53  
54  
55

56 Pre-planned subgroup analysis will be by a) suspected/probable or confirmed COVID-19, b)  
57  
58 diagnosis in pregnancy or postnatal period, c) trimester of diagnosis (first, second or third), d)  
59  
60

1  
2  
3 country income-level (high or low- and middle-income country), e) screening strategies  
4  
5 (universal, symptom-based or risk-based testing), f) maternal risk status (low or high) and g)  
6  
7 study quality (low or high). We will undertake additional sensitivity analysis to explore the  
8  
9 effects of different populations (unselected, selected) and by excluding women with  
10  
11 suspected COVID-19 and studies at high risk of bias. We will use trial sequential analysis to  
12  
13 control for type I and II errors while accounting for updating estimations of between-study  
14  
15 heterogeneity. A priori assumptions on statistical power, minimal clinically relevant effect  
16  
17 and heterogeneity between trials will be used to define maximum sample size to detect such  
18  
19 an effect. Boundaries of statistical significance according to sample size will be defined and  
20  
21 used to determine statistical significance for each systematic review update result.  
22  
23  
24  
25  
26  
27

28 We have established a pool of peer reviewers to rapidly assess the findings. The initial pre-  
29  
30 peer reviewed findings will be published in a dedicated website, followed by the full findings  
31  
32 when peer review is complete. We will simultaneously submit our work for publication in  
33  
34 scientific journals with clear reference to the version of the living systematic review provided  
35  
36 in that submission. Where journals allow, we will update our findings in the journals at set  
37  
38 intervals required by the journal.  
39  
40  
41  
42  
43

#### 44 **Patient and public involvement**

45  
46 Katie's Team Patients and Public Involvement group- a dedicated women's research and  
47  
48 health advisory group, were involved in the design of the protocol, and will contribute to the  
49  
50 interpretation and dissemination of the result.  
51  
52  
53

#### 54 **DISCUSSION**

1  
2  
3 Our living systematic review will address key research questions relevant to SARS-CoV-2  
4 infection in pregnancy and postpartum period. Our review is based on a prospective protocol  
5 with plans to continuously update all review processes from search to publication at specific  
6 time points. The findings of the review will directly inform living guidelines and policies as  
7 new evidence emerge.  
8  
9  
10  
11  
12  
13  
14  
15  
16

17 Our detailed literature search is a major strength of the review. In addition to the WHO  
18 COVID-19 database, our links with Cochrane Fertility and Gynaecology and EPPI Centre  
19 groups, and additional searches for studies mapped by dedicated websites as well as blogs  
20 and social media networks means that the chance of missing relevant studies are small.  
21  
22 Through our networks with key collaborators in the WHO MNCAH (Maternal, neonatal,  
23 child and adolescent health) COVID-19 research group,<sup>27</sup> and relevant working groups, we  
24 will be able to access and include unpublished data. Our collaborative links with researchers  
25 in China provides access to Chinese language databases, so that these studies are not missed.  
26  
27  
28  
29  
30  
31  
32  
33  
34  
35  
36  
37

38 We have developed the protocol to ensure that all stages of the review are robust by adhering  
39 to recommended methods for conduct and reporting of systematic reviews.<sup>28</sup> By restricting  
40 case reports and series to the research question on mother-to-child transmission alone, we  
41 will not only ensure that relevant cases are not missed, but also avoid biased estimates for  
42 other research questions on risk factors and prevalence. Determination of mother-to-child  
43 SARS-CoV-2 transmission is particularly challenging since there is no consensus on what  
44 constitutes intrauterine, intrapartum, and postpartum transmission (including breast-milk  
45 versus horizontal transmission).<sup>6</sup> To maximise data collection addressing this question, we  
46 will include case reports and case series for this part of the review. We will collect data on all  
47  
48  
49  
50  
51  
52  
53  
54  
55  
56  
57  
58  
59  
60

1  
2  
3 types of samples to enable evaluation of varying definitions of the evidence required for  
4 confirmation of mother-to-child SARS-CoV-2 transmission and timing.  
5  
6  
7  
8  
9

10 Our work is subject to some limitations. Our protocol has been developed based on our  
11 current knowledge of the COVID-19. As the pandemic unfolds, emerging new evidence may  
12 require changes in the protocol. The systematic review will be influenced by the  
13 characteristics of the individual studies, which may comprise heterogeneous populations,  
14 definitions of COVID-19, sampling frames, test strategies for diagnosis, definitions and  
15 reporting of outcomes. We have addressed these challenges by clearly defining the inclusion  
16 criteria, and by exploring heterogeneity through sensitivity and subgroup analyses. The  
17 findings will be reported as 95% CI to communicate the uncertainty around the pooled  
18 estimates and prediction intervals (PI) to anticipate the variability in new study estimates.  
19 Given the urgency of the situation in the pandemic era, many studies are published as  
20 preprints, often followed by a full publication at a later date. The living systematic review  
21 needs to be responsive to any changes in data between the preprint to full publication stage.  
22 Furthermore, there is a risk of duplicate data, as individual studies may report the findings of  
23 the same mother-baby data that have been published elsewhere. We plan to exclude studies  
24 with suspected duplicate data, and contact the authors of the primary studies for clarification.  
25 This review may be subject to publication bias, since studies with perceived positive results  
26 may be published faster than those with perceived negative results. We will continuously  
27 review registries of randomised controlled trials to detect trials that should have reported  
28 results but that have not done so and will contact corresponding authors to obtain results.  
29  
30  
31  
32  
33  
34  
35  
36  
37  
38  
39  
40  
41  
42  
43  
44  
45  
46  
47  
48  
49  
50  
51  
52  
53  
54  
55

56 Many of the automated tools for living systematic review are mainly developed for reviews  
57 on randomised trials (RCT), and not for observational studies.<sup>29</sup> Unlike traditional systematic  
58  
59  
60

1  
2  
3 reviews, living systematic reviews require substantial investment in time and human  
4  
5 resources, and resources to regularly update the findings. Sustained funding is required to  
6  
7 maintain the same level of output over a longer period of time. This is particularly  
8  
9 challenging, as the publication rate of studies on SARS-Cov-2 infection in pregnancy and  
10  
11 postpartum is likely to increase exponentially. To ensure that all relevant studies are  
12  
13 identified in a timely manner, in addition to traditional searches, we will use our  
14  
15 collaborations with other global efforts to map studies on COVID-19 and pregnancy and  
16  
17 postpartum, and automated alerts to identify new evidence when it gets published. Given the  
18  
19 wide scope of this review, numerous reviewers will be involved, requiring clear operating  
20  
21 procedures and pathways in place for workflow, training, monitoring and quality assessment.  
22  
23 The necessity to swiftly publish the collated evidence need to be balanced against publishing  
24  
25 the findings after peer review. To be able to sustain the level of reviewer turn-around every  
26  
27 two weeks will be a challenge.  
28  
29  
30  
31  
32  
33

34  
35 To-date, apart from Cochrane, very few journals provide specific guidelines for publication  
36  
37 of living systematic reviews and its subsequent update.<sup>30</sup> Various models of publication have  
38  
39 been considered.<sup>31</sup> The first model is similar to the Cochrane reviews, where with each new  
40  
41 update (usually done in yearly intervals), there is a new publication with a new version and  
42  
43 DOI in PubMed with linked updates between versions. This model can also take into account  
44  
45 any changes in authors between the versions.<sup>32</sup> However, in the current situation of rapidly  
46  
47 evolving evidence, this is likely to result in numerous publications, even if reported on a  
48  
49 monthly basis. In the second model, the introduction and methods of the main manuscript  
50  
51 does not change, with only changes in the results section, which is written in such a way that  
52  
53 most of the information is provided in Tables and Figures that are revised along with the  
54  
55 abstract. The discussion section of the newer version can incorporate a paragraph on the  
56  
57  
58  
59  
60

1  
2  
3 implications of new findings. The manuscript will be less resource intensive to prepare in the  
4  
5 second model, but the original version should have been written in a generic manner to  
6  
7 accommodate new information emerging in subsequent versions. In another model, the  
8  
9 findings of subsequent updated analyses appear as new appendices, with no changes in the  
10  
11 original abstract or manuscript. While this model requires less efforts from authors, editors  
12  
13 and peer reviewers, it can mistakenly provide inaccurate old evidence if readers only access  
14  
15 the abstract. Furthermore, this model makes it difficult to add or remove authors according to  
16  
17 the changes in their contribution to subsequent versions.  
18  
19  
20  
21  
22  
23

24 In the midst of the current pandemic, much still remains unknown about how SARS-CoV-2  
25  
26 infection affects pregnant and postpartum women and their babies compared to reproductive  
27  
28 aged non-pregnant women. It is essential that clinicians' decisions to manage pregnant and  
29  
30 postpartum women and their babies with COVID-19 are guided by the evidence. Our living  
31  
32 systematic review is well suited to rapidly provide updated findings for translation into  
33  
34 clinical practice. The flexibility of the living systematic review needs to be matched by a  
35  
36 willingness of journal editors and guideline makers to provide a framework that allows rapid  
37  
38 dissemination of the new findings.  
39  
40  
41  
42  
43  
44

#### 45 **Ethics and dissemination**

46  
47 No ethical concerns. The findings will be disseminated through a designated website,  
48  
49 publications, presentations in webinars and social media.  
50  
51

#### 52 **Data statement**

53  
54 Data sharing not applicable as no datasets generated and/or analysed for this study  
55  
56

#### 57 **Author contributions**

58  
59 All authors contributed to the development of the protocol and writing of the manuscript.  
60



1  
2  
3  
4 MY, LD, TK, SC - wrote the first draft of the manuscript

5  
6  
7 JA, ES - designed the study

8  
9 DC, SL - reviewed the manuscript and were involved in quality assessment and data  
10 extraction. They have approved the final version of the manuscript.

11  
12  
13 ACL, AD, DZ, RB - reviewed the manuscript and are involved in study selection, and they  
14 have approved the final version of the manuscript.

15  
16 XQ, MY, MvW, EK, EvL, LM, HK, AK, ST, JT, VB, NB, EK, CRK, AT, PRS, HPH, OTO -  
17 reviewed the manuscript, contributing critical changes, and they have approved the final  
18 version of the manuscript.

19  
20  
21 JZ - reviewed the manuscript and will conduct the statistical analysis. He approved the final  
22 version of the manuscript.

23  
24 MB - designed the study, and reviewed the manuscript, and has approved the final version of  
25 the manuscript.

26  
27 ST - conceived and designed the study, and reviewed the manuscript and approved the final  
28 version of the manuscript. ST is the guarantor.

29  
30  
31 All authors reviewed the manuscript, contributing critical changes, and approved the final  
32 version of the manuscript.

### 33 34 35 **Funding statement**

36  
37 The work is partially funded by the World Health Organization. The authors alone are  
38 responsible for the views expressed in this manuscript and they do not necessarily represent  
39 the decisions, policy or views of the funding bodies. The views of the funding bodies have  
40 not influenced the content of this manuscript.

### 41 42 43 **Competing interests**

44  
45  
46 None

### 47 48 **References**

- 49 1. WHO announces COVID-19 outbreak a pandemic: World Health Organisation [Internet];  
50 2020. <https://www.euro.who.int/en/health-topics/health-emergencies/coronavirus-covid-19/news/news/2020/3/who-announces-covid-19-outbreak-a-pandemic> (accessed Jun 11  
51 2020).
- 52 2. COVID-19 Dashboard: John Hopkins University [Internet].  
53 <https://coronavirus.jhu.edu/map.html> (accessed Apr 21 2020).
- 54 3. Rajgor DD, Lee MH, Archuleta S, et al. The many estimates of the COVID-19 case fatality  
55 rate. *Lancet Infect Dis* 2020 doi: 10.1016/S1473-3099(20)30244-9
- 56 4. Mor G, Cardenas I. The immune system in pregnancy: a unique complexity. *Am J Reprod*  
57 *Immunol* 2010;63(6):425-33. doi: 10.1111/j.1600-0897.2010.00836.x
- 58  
59  
60



5. Schwartz DA, Graham AL. Potential Maternal and Infant Outcomes from (Wuhan) Coronavirus 2019-nCoV Infecting Pregnant Women: Lessons from SARS, MERS, and Other Human Coronavirus Infections. *Viruses* 2020;12(2) doi: 10.3390/v12020194
6. Blumberg DA, Underwood MA, Hedriana HL, et al. Vertical Transmission of SARS-CoV-2: What is the Optimal Definition? *Am J Perinatol* 2020 doi: 10.1055/s-0040-1712457
7. Covid-19 and pregnancy. *BMJ* 2020;369:m1672. doi: 10.1136/bmj.m1672
8. Kmietowicz Z. Covid-19: Half of pregnant women in UK hospitals are from ethnic minorities. *BMJ* 2020;369:m2266. doi: 10.1136/bmj.m2266
9. Millett GA, Jones AT, Benkeser D, et al. Assessing Differential Impacts of COVID-19 on Black Communities. *Ann Epidemiol* 2020 doi: 10.1016/j.annepidem.2020.05.003
10. Knight M, Bunch K, Vousden N, et al. Characteristics and outcomes of pregnant women admitted to hospital with confirmed SARS-CoV-2 infection in UK: national population based cohort study. *BMJ* 2020;369:m2107. doi: 10.1136/bmj.m2107
11. Haghani M, Bliemer MCJ, Goerlandt F, et al. The scientific literature on Coronaviruses, COVID-19 and its associated safety-related research dimensions: A scientometric analysis and scoping review. *Saf Sci* 2020:104806. doi: 10.1016/j.ssci.2020.104806
12. Lee AY, Lin MW. Rapid publishing in the era of coronavirus disease 2019 (COVID-19). *Med J Aust* 2020 doi: 10.5694/mja2.50617
13. Knottnerus JA, Tugwell P. Methodological challenges in studying the COVID-19 pandemic crisis. *J Clin Epidemiol* 2020;121:A5-A7. doi: 10.1016/j.jclinepi.2020.04.001
14. Shokraneh F, Adams CE. Study-based registers of randomized controlled trials: Starting a systematic review with data extraction or meta-analysis. *Bioimpacts* 2017;7(4):209-17. doi: 10.15171/bi.2017.25
15. Allotey J, Bonet M, Zamora J, et al. COVID-19 in pregnant women: a Living Systematic Review on prevalence, presentation, prognosis and treatment. PROSPERO 2020 CRD42020178076. *Prospero [Internet]* 2020
16. COVID-19, Maternal and Child Health, Nutrition: John Hopkins Center for Humanitarian health [Internet]. <http://hopkinshumanitarianhealth.org/empower/advocacy/covid-19/covid-19-children-and-nutrition/> (accessed Jun 9 2020).
17. COVID-19 Research Community: ResearchGate [Internet]. <https://www.researchgate.net/community/COVID-19> (accessed Jun 9 2020).
18. COVID-19: a living systematic map of the evidence: Eppi-centre [Internet]. <http://eppi.ioe.ac.uk/cms/Projects/DepartmentofHealthandSocialCare/Publishedreviews/COVID-19Livingssystematicmapoftheevidence/tabid/3765/Default.aspx> (accessed Jun 11 2020).
19. NIPH systematic and living map on COVID-19 evidence: Norwegian Institute of Public Health [Internet]. [https://www.nornesk.no/forskningskart/NIPH\\_mainMap.html](https://www.nornesk.no/forskningskart/NIPH_mainMap.html) (accessed Jun 11 2020).
20. Advanced Search: Cochrane Library. <https://www.cochranelibrary.com/advanced-search> (accessed Jun 11 2020).
21. Covidence: Cochrane. <https://community.cochrane.org/help/tools-and-software/covidence> (accessed Jun 14 2020).
22. Dekkers OM, Egger M, Altman DG, et al. Distinguishing case series from cohort studies. *Ann Intern Med* 2012;156(1 Pt 1):37-40. doi: 10.7326/0003-4819-156-1-201201030-00006
23. Wells G, Shea B, O'Connell D, et al. The Newcastle-Ottawa Scale (NOS) for assessing the quality of nonrandomised studies in meta-analysis: The Ottawa Hospital Research Institute; 2013. [http://www.ohri.ca/programs/clinical\\_epidemiology/oxford.asp](http://www.ohri.ca/programs/clinical_epidemiology/oxford.asp) (accessed Jun 11 2020).
24. Sterne JAC, Savovic J, Page MJ, et al. RoB 2: a revised tool for assessing risk of bias in randomised trials. *BMJ* 2019;366:l4898. doi: 10.1136/bmj.l4898

- 1  
2  
3 25. Whiting PF, Rutjes AW, Westwood ME, et al. QUADAS-2: a revised tool for the quality  
4 assessment of diagnostic accuracy studies. *Ann Intern Med* 2011;155(8):529-36. doi:  
5 10.7326/0003-4819-155-8-201110180-00009  
6  
7 26. Hoy D, Brooks P, Woolf A, et al. Assessing risk of bias in prevalence studies:  
8 modification of an existing tool and evidence of interrater agreement. *J Clin Epidemiol*  
9 2012;65(9):934-9. doi: 10.1016/j.jclinepi.2011.11.014  
10  
11 27. Maternal, newborn, child and adolescent health (MNCAH) consolidated data portal:  
12 World Health Organisation [Internet].  
13 [https://www.who.int/maternal\\_child\\_adolescent/epidemiology/mncah-data-platform/en/](https://www.who.int/maternal_child_adolescent/epidemiology/mncah-data-platform/en/)  
14 (accessed Jun 11 2020).  
15  
16 28. Moher D, Liberati A, Tetzlaff J, et al. Preferred reporting items for systematic reviews  
17 and meta-analyses: the PRISMA statement. *BMJ* 2009;339:b2535. doi: 10.1136/bmj.b2535  
18  
19 29. Khamis AM, Kahale LA, Pardo-Hernandez H, et al. Methods of conduct and reporting of  
20 living systematic reviews: a protocol for a living methodological survey. *F1000Res*  
21 2019;8:221. doi: 10.12688/f1000research.18005.2  
22  
23 30. Brooker J, Synnot A, Mcdonald S, et al. Guidance for the production and publication of  
24 Cochrane living systematic reviews: Cochrane Reviews in living mode. 2019.  
25 [https://community.cochrane.org/sites/default/files/uploads/inline-](https://community.cochrane.org/sites/default/files/uploads/inline-files/Transform/201912_LSR_Revised_Guidance.pdf)  
26 [files/Transform/201912\\_LSR\\_Revised\\_Guidance.pdf](https://community.cochrane.org/sites/default/files/uploads/inline-files/Transform/201912_LSR_Revised_Guidance.pdf).  
27  
28 31. Elliott JH, Synnot A, Turner T, et al. Living systematic review: 1. Introduction-the why,  
29 what, when, and how. *J Clin Epidemiol* 2017;91:23-30. doi: 10.1016/j.jclinepi.2017.08.010  
30  
31 32. Cumpston M, Chandler J. Updating a review. In: Higgins JPT TJ, Chandler J, Cumpston  
32 M, Li T, Page MJ, Welch VA, ed. *Cochrane Handbook for Systematic Reviews of*  
33 *Interventions* version 60 (updated August 2019): Cochrane, 2019.  
34  
35  
36  
37  
38  
39  
40  
41  
42  
43  
44  
45  
46  
47  
48  
49  
50  
51  
52  
53  
54  
55  
56  
57  
58  
59  
60

## Figure Legend

Figure 1: Steps in the living systematic review (LSR) on COVID-19 in pregnant and postpartum women

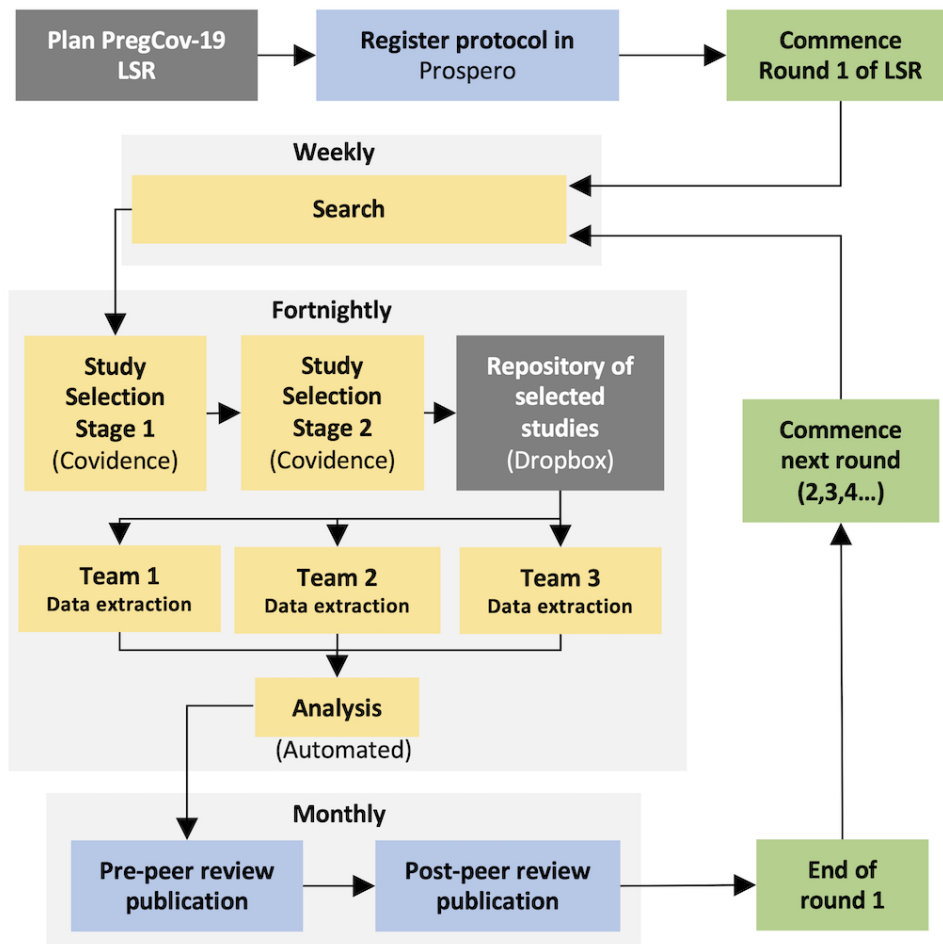

Fig 1. Steps in the living systematic review (LSR) on COVID-19 in pregnant and postpartum women

90x90mm (300 x 300 DPI)

1  
2  
3 **Appendix 1: Pubmed search strategy to be used in the living systematic review on**  
4 **COVID-19 in pregnant and recently pregnant women**  
5  
6  
7

| Item | Term                                                |
|------|-----------------------------------------------------|
| 1    | pregnancy/                                          |
| 2    | pregnan*.tw.                                        |
| 3    | neonatal.tw.                                        |
| 4    | perinatal.tw.                                       |
| 5    | mothers/.                                           |
| 6    | mother.tw.                                          |
| 7    | maternal.tw.                                        |
| 8    | obstetric.tw.                                       |
| 9    | infant, newborn/                                    |
| 10   | infant.tw.                                          |
| 11   | newborn.tw.                                         |
| 12   | child*.tw.                                          |
| 13   | or/1-12                                             |
| 14   | COVID-19.tw.                                        |
| 15   | COVID-2019.tw.                                      |
| 16   | severe acute respiratory syndrome coronavirus 2.tw. |
| 17   | 2019-nCoV.tw.                                       |
| 18   | SARS-CoV-2.tw.                                      |
| 19   | 2019nCoV.tw                                         |
| 20   | or/14-19                                            |
| 21   | coronavirus.tw.                                     |
| 22   | 2019/12.pd                                          |
| 23   | 2020.pd.                                            |
| 24   | or/22-23                                            |
| 25   | 21 and 24                                           |
| 24   | or/20-25                                            |
| 25   | 13 and 24                                           |

**PRISMA-P (Preferred Reporting Items for Systematic review and Meta-Analysis Protocols) 2015 checklist addressed in the living systematic review protocol on COVID-19 in pregnant and recently pregnant women**

| Section and topic                 | Item No | Checklist item                                                                                                                                                                                                                | Page No.       |
|-----------------------------------|---------|-------------------------------------------------------------------------------------------------------------------------------------------------------------------------------------------------------------------------------|----------------|
| <b>ADMINISTRATIVE INFORMATION</b> |         |                                                                                                                                                                                                                               |                |
| Title:                            |         |                                                                                                                                                                                                                               |                |
| Identification                    | 1a      | Identify the report as a protocol of a systematic review                                                                                                                                                                      | 1              |
| Update                            | 1b      | If the protocol is for an update of a previous systematic review, identify as such                                                                                                                                            | Not applicable |
| Registration                      | 2       | If registered, provide the name of the registry (such as PROSPERO) and registration number                                                                                                                                    | 4              |
| Authors:                          |         |                                                                                                                                                                                                                               |                |
| Contact                           | 3a      | Provide name, institutional affiliation, e-mail address of all protocol authors; provide physical mailing address of corresponding author                                                                                     | 1-2            |
| Contributions                     | 3b      | Describe contributions of protocol authors and identify the guarantor of the review                                                                                                                                           | 16             |
| Amendments                        | 4       | If the protocol represents an amendment of a previously completed or published protocol, identify as such and list changes; otherwise, state plan for documenting important protocol amendments                               | Not applicable |
| Support:                          |         |                                                                                                                                                                                                                               |                |
| Sources                           | 5a      | Indicate sources of financial or other support for the review                                                                                                                                                                 | 16             |
| Sponsor                           | 5b      | Provide name for the review funder and/or sponsor                                                                                                                                                                             | 16             |
| Role of sponsor or funder         | 5c      | Describe roles of funder(s), sponsor(s), and/or institution(s), if any, in developing the protocol                                                                                                                            | 16             |
| <b>INTRODUCTION</b>               |         |                                                                                                                                                                                                                               |                |
| Rationale                         | 6       | Describe the rationale for the review in the context of what is already known                                                                                                                                                 | 6-7            |
| Objectives                        | 7       | Provide an explicit statement of the question(s) the review will address with reference to participants, interventions, comparators, and outcomes (PICO)                                                                      | 7-8            |
| <b>METHODS</b>                    |         |                                                                                                                                                                                                                               |                |
| Eligibility criteria              | 8       | Specify the study characteristics (such as PICO, study design, setting, time frame) and report characteristics (such as years considered, language, publication status) to be used as criteria for eligibility for the review | 9              |

|                                    |     |                                                                                                                                                                                                                                                  |    |
|------------------------------------|-----|--------------------------------------------------------------------------------------------------------------------------------------------------------------------------------------------------------------------------------------------------|----|
| Information sources                | 9   | Describe all intended information sources (such as electronic databases, contact with study authors, trial registers or other grey literature sources) with planned dates of coverage                                                            | 9  |
| Search strategy                    | 10  | Present draft of search strategy to be used for at least one electronic database, including planned limits, such that it could be repeated                                                                                                       | 9  |
| Study records:                     |     |                                                                                                                                                                                                                                                  |    |
| Data management                    | 11a | Describe the mechanism(s) that will be used to manage records and data throughout the review                                                                                                                                                     | 9  |
| Selection process                  | 11b | State the process that will be used for selecting studies (such as two independent reviewers) through each phase of the review (that is, screening, eligibility and inclusion in meta-analysis)                                                  | 9  |
| Data collection process            | 11c | Describe planned method of extracting data from reports (such as piloting forms, done independently, in duplicate), any processes for obtaining and confirming data from investigators                                                           | 9  |
| Data items                         | 12  | List and define all variables for which data will be sought (such as PICO items, funding sources), any pre-planned data assumptions and simplifications                                                                                          | 10 |
| Outcomes and prioritization        | 13  | List and define all outcomes for which data will be sought, including prioritization of main and additional outcomes, with rationale                                                                                                             | 10 |
| Risk of bias in individual studies | 14  | Describe anticipated methods for assessing risk of bias of individual studies, including whether this will be done at the outcome or study level, or both; state how this information will be used in data synthesis                             | 10 |
| Data synthesis                     | 15a | Describe criteria under which study data will be quantitatively synthesised                                                                                                                                                                      | 11 |
|                                    | 15b | If data are appropriate for quantitative synthesis, describe planned summary measures, methods of handling data and methods of combining data from studies, including any planned exploration of consistency (such as $I^2$ , Kendall's $\tau$ ) | 11 |
|                                    | 15c | Describe any proposed additional analyses (such as sensitivity or subgroup analyses, meta-regression)                                                                                                                                            | 11 |
|                                    | 15d | If quantitative synthesis is not appropriate, describe the type of summary planned                                                                                                                                                               | 11 |
| Meta-bias(es)                      | 16  | Specify any planned assessment of meta-bias(es) (such as publication bias across studies, selective reporting within studies)                                                                                                                    | 11 |
| Confidence in cumulative evidence  | 17  | Describe how the strength of the body of evidence will be assessed (such as GRADE)                                                                                                                                                               | 11 |
