# Supplementary material for: Clinical manifestations, prevalence, risk factors, outcomes, transmission, diagnosis and treatment of COVID-19 in pregnancy and postpartum: a living systematic review protocol
Source: PubMed Central journal article supplement (PMC7712931; doi:10.1136/bmjopen-2020-041868), 2020-12-02
Supplement: bmjopen-2020-041868supp001.pdf [file bmjopen-2020-041868supp001.pdf]

**Appendix 1: Pubmed search strategy to be used in the living systematic review on COVID-19 in pregnant and recently pregnant women**

| Item | Term                                                |
|------|-----------------------------------------------------|
| 1    | pregnancy/                                          |
| 2    | pregnan*.tw.                                        |
| 3    | neonatal.tw.                                        |
| 4    | perinatal.tw.                                       |
| 5    | mothers/.                                           |
| 6    | mother.tw.                                          |
| 7    | maternal.tw.                                        |
| 8    | obstetric.tw.                                       |
| 9    | infant, newborn/                                    |
| 10   | infant.tw.                                          |
| 11   | newborn.tw.                                         |
| 12   | child*.tw.                                          |
| 13   | or/1-12                                             |
| 14   | COVID-19.tw.                                        |
| 15   | COVID-2019.tw.                                      |
| 16   | severe acute respiratory syndrome coronavirus 2.tw. |
| 17   | 2019-nCoV.tw.                                       |
| 18   | SARS-CoV-2.tw.                                      |
| 19   | 2019nCoV.tw                                         |
| 20   | or/14-19                                            |
| 21   | coronavirus.tw.                                     |
| 22   | 2019/12.pd                                          |
| 23   | 2020.pd.                                            |
| 24   | or/22-23                                            |
| 25   | 21 and 24                                           |
| 24   | or/20-25                                            |
| 25   | 13 and 24                                           |
